# Supplementary material
Source: PubMed Central journal article supplement (PMC4874853)
Supplement: NIHMS776369-supplement-sup2.pdf [file NIHMS776369-supplement-sup2.pdf]

**AUTHOR QUERY FORM****Journal:** CELL**Article Number:** 8873

Dear Author,

Please check your proof carefully and mark all corrections at the appropriate place in the proof.

| <b>Location<br/>in article</b> | <b>Query / Remark: Click on the Q link to find the query's location in text<br/>Please insert your reply or correction at the corresponding line in the proof</b> |
|--------------------------------|-------------------------------------------------------------------------------------------------------------------------------------------------------------------|
|                                | There are no queries in this article                                                                                                                              |

Thank you for your assistance.

# Effector T Cells Abrogate Stroma-Mediated Chemoresistance in Ovarian Cancer

## Graphical Abstract

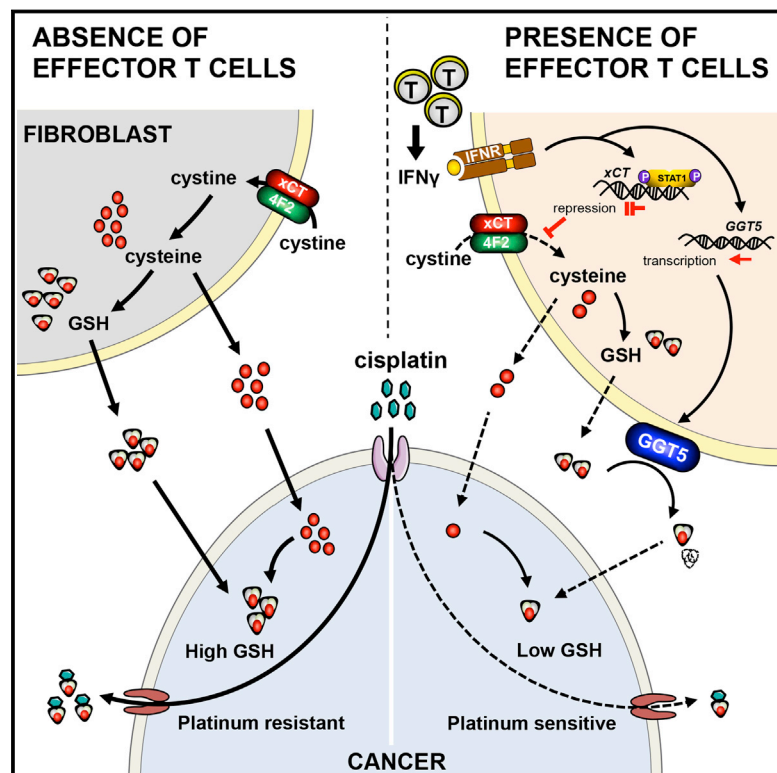

## Authors

Weimin Wang, Ilona Kryczek, Lubomír Dostál, ..., Adnan Munkarah, J. Rebecca Liu, Weiping Zou

## Correspondence

rliu@med.umich.edu (J.R.L.), wzou@med.umich.edu (W.Z.)

## In Brief

T cells abrogate chemoresistance of ovarian tumors by altering the metabolism of stromal fibroblasts in the tumor microenvironment, revealing a point of intersection for combined immunotherapy and chemotherapy in cancer treatment.

## Highlights

- Fibroblasts diminish platinum content in cancer cells, resulting in drug resistance
- GSH and cysteine released by fibroblasts contribute to platinum resistance
- T cells alter fibroblast GSH and cystine metabolism and abolish the resistance
- Fibroblasts and CD8<sup>+</sup> T cells associate with patient chemotherapy response

# Effector T Cells Abrogate Stroma-Mediated Chemoresistance in Ovarian Cancer

Weimin Wang,<sup>1,2</sup> Ilona Kryczek,<sup>2</sup> Lubomír Dostál,<sup>3</sup> Heng Lin,<sup>2</sup> Lijun Tan,<sup>1</sup> Lili Zhao,<sup>4</sup> Fujia Lu,<sup>2</sup> Shuang Wei,<sup>2</sup> Tomasz Maj,<sup>2</sup> Dongjun Peng,<sup>2</sup> Gong He,<sup>1</sup> Linda Vatan,<sup>2</sup> Wojciech Szeliga,<sup>2</sup> Rork Kuick,<sup>4</sup> Jan Kotarski,<sup>5</sup> Rafał Tarkowski,<sup>5</sup> Yali Dou,<sup>6</sup> Ramandeep Rattan,<sup>7</sup> Adnan Munkarah,<sup>7</sup> J. Rebecca Liu,<sup>1,8,10,\*</sup> and Weiping Zou<sup>2,8,9,10,\*</sup>

<sup>1</sup>Department of Obstetrics and Gynecology, University of Michigan School of Medicine, Ann Arbor, MI 48109, USA

<sup>2</sup>Department of Surgery, University of Michigan School of Medicine, Ann Arbor, MI 48109, USA

<sup>3</sup>Department of Chemistry, University of Michigan, Ann Arbor, MI 48109, USA

<sup>4</sup>Department of Biostatistics, University of Michigan School of Medicine, Ann Arbor, MI 48109, USA

<sup>5</sup>The First Department of Gynecologic Oncology and Gynecology, Medical University in Lublin, Lublin 20-081, Poland

<sup>6</sup>Department of Pathology, University of Michigan School of Medicine, Ann Arbor, MI 48109, USA

<sup>7</sup>Department of Women's Health Services, Henry Ford Health System, Detroit, MI 48202, USA

<sup>8</sup>The University of Michigan Comprehensive Cancer Center, University of Michigan, Ann Arbor, MI 48109, USA

<sup>9</sup>Graduate Programs in Immunology and Tumor Biology, University of Michigan, Ann Arbor, MI 48109, USA

<sup>10</sup>Co-senior author

\*Correspondence: [rliu@med.umich.edu](mailto:rliu@med.umich.edu) (J.R.L.), [wzou@med.umich.edu](mailto:wzou@med.umich.edu) (W.Z.)

<http://dx.doi.org/10.1016/j.cell.2016.04.009>

## SUMMARY

Effector T cells and fibroblasts are major components in the tumor microenvironment. The means through which these cellular interactions affect chemoresistance is unclear. Here, we show that fibroblasts diminish nuclear accumulation of platinum in ovarian cancer cells, resulting in resistance to platinum-based chemotherapy. We demonstrate that glutathione and cysteine released by fibroblasts contribute to this resistance. CD8<sup>+</sup> T cells abolish the resistance by altering glutathione and cysteine metabolism in fibroblasts. CD8<sup>+</sup> T-cell-derived interferon (IFN) $\gamma$  controls fibroblast glutathione and cysteine through upregulation of glutamyltransferases and transcriptional repression of system xc<sup>-</sup> cystine and glutamate antiporter via the JAK/STAT1 pathway. The presence of stromal fibroblasts and CD8<sup>+</sup> T cells is negatively and positively associated with ovarian cancer patient survival, respectively. Thus, our work uncovers a mode of action for effector T cells: they abrogate stromal-mediated chemoresistance. Capitalizing upon the interplay between chemotherapy and immunotherapy holds high potential for cancer treatment.

## INTRODUCTION

Initial clinical response of ovarian cancer patients to surgical debulking and chemotherapy with platinum-based drugs is often excellent. However, relapse and metastasis due to drug resistance is common and patients oftentimes succumb to their disease. Studies regarding chemoresistance in ovarian cancer have focused on cancer genetic alterations, apoptosis, and drug

metabolism. However, it is unknown whether and how effector CD8<sup>+</sup> T cells play a role in drug resistance.

The human cancer immune microenvironment holds the key to understanding the nature of immunity in response to tumor progression and tumor immunotherapy (Topalian et al., 2015; Zou, 2005; Zou et al., 2016). Interestingly, the efficacy of chemotherapy, radiotherapy, and oncologic antibody targeting therapy also depends upon interferon signaling and CD8<sup>+</sup> T cell immunity (Binder et al., 2015; Lee et al., 2009; Zitvogel et al., 2010). Regardless of the type of therapy, the presence of tumor-infiltrating CD8<sup>+</sup> T cells is a favorable prognostic factor in many types of cancer, including ovarian cancer (Peng et al., 2015; Sato et al., 2005; Zhang et al., 2003; Zhao et al., 2016). This raises the possibility that CD8<sup>+</sup> T cells may play a role in the prevention of chemoresistance in human cancer. In the current work, we have tested this possibility in the context of ovarian cancer.

In addition to T cells and tumor cells, fibroblasts are one of the major cellular components in the tumor microenvironment. Tumor-associated fibroblasts are involved in immune regulation (Kraman et al., 2010) and tumor progression (Özdemir et al., 2014) in tumor bearing mouse models. Thus, in the current work, we examined the potential interaction between CD8<sup>+</sup> T cells and fibroblasts in ovarian cancer and found that this interaction shapes the balance between chemotherapeutic resistance and sensitivity in ovarian cancer. We have further dissected the underlying cellular and molecular mechanisms and its pathological relevance in patients with ovarian cancer.

## RESULTS

### Cancer-Associated Fibroblasts Confer Platinum Resistance to Ovarian Cancer Cells

High grade serous ovarian carcinoma (HGSOC) is the most aggressive subtype of epithelial ovarian cancer. To test if HGSOC-associated fibroblasts play a role in platinum resistance,

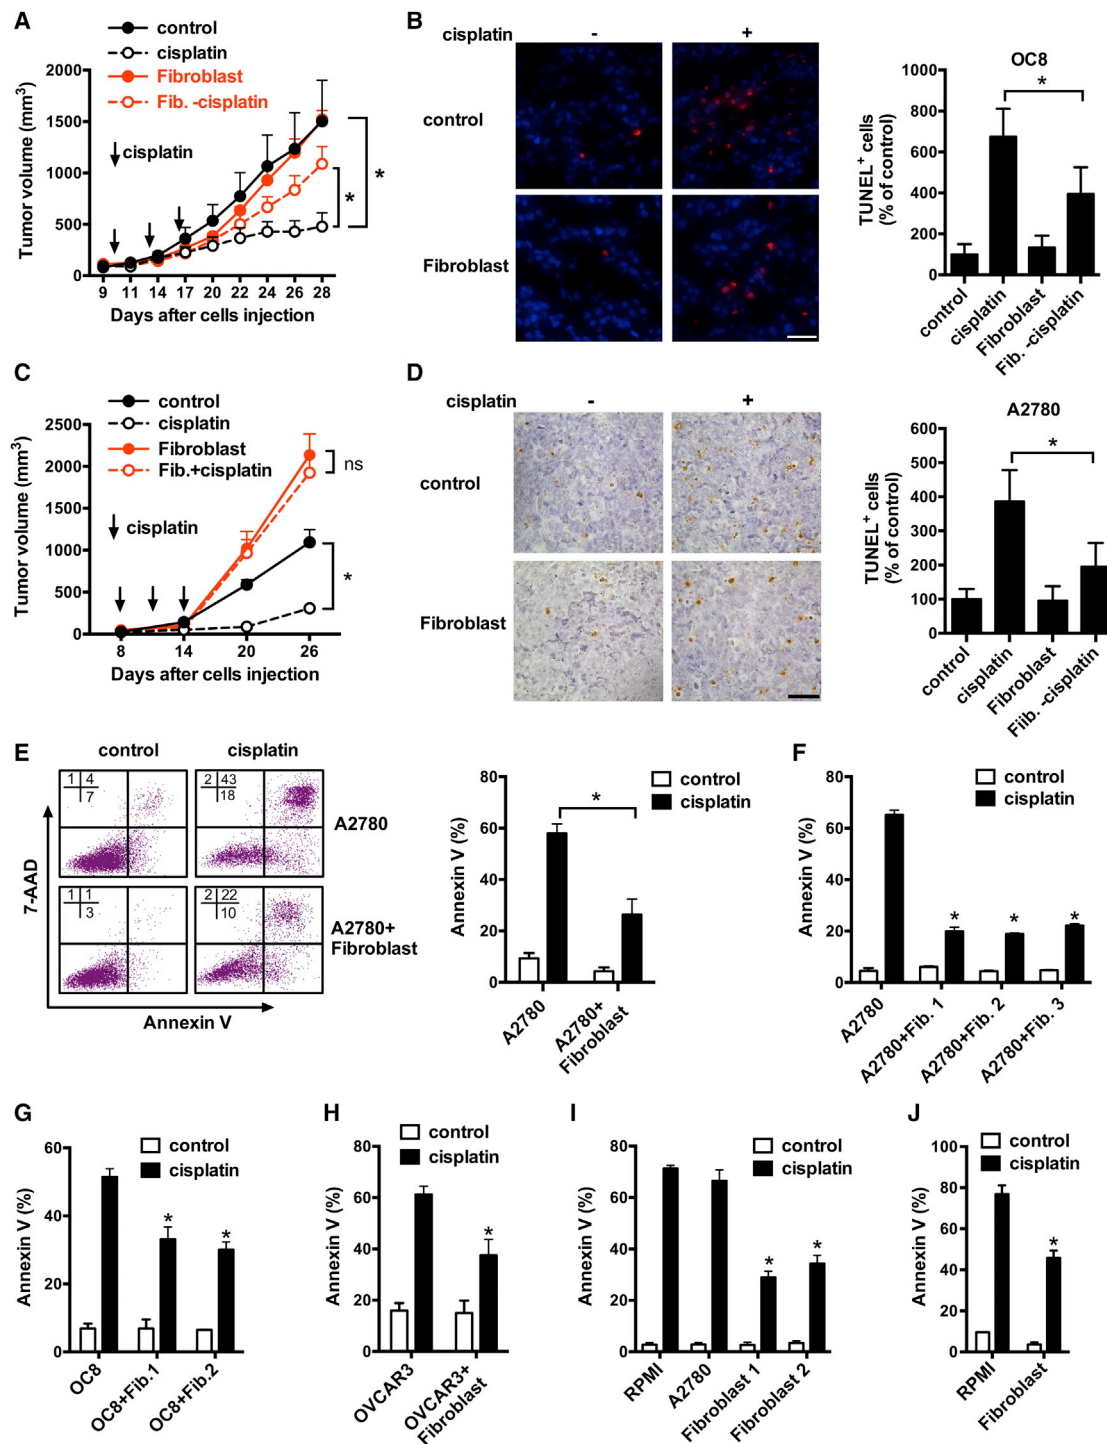

**Figure 1. Fibroblasts Induce Cancer Platinum Resistance**

(A–D) Effect of fibroblasts on cisplatin resistance to OC8 (A and B) or A2780 (C and D) in vivo. Tumor cells or tumor plus fibroblasts were inoculated subcutaneously into mice and treated with or without cisplatin every 3 days for three cycles. Tumor volume was monitored (A and C) (mean ± SEM; n = 5). Apoptosis was determined by TUNEL staining. Representative images and TUNEL-positive cells (percentage of control) are shown (B and D). Scale bar, 40 μm. Mean ± SD; n = 10 random fields from three sections. \*p < 0.05.

(E) Cisplatin-induced apoptosis on GFP<sup>+</sup> tumor cells in the mixed co-culture of A2780-GFP and fibroblasts. Representative FACS data are shown (left). Mean ± SD, n = 3. \*p < 0.05.

(legend continued on next page)



we isolated fibroblasts from HGSOC tissues for our studies (Table S1). Polychromatic flow cytometry analysis showed that fibroblasts were CD45<sup>-</sup>, epithelial cell adhesion molecule-negative (EPCAM<sup>-</sup>), CD24<sup>-</sup>, CD44<sup>+</sup>, CD105<sup>+</sup>, and platelet-derived growth factor receptor- $\alpha$  positive (PDGFRA<sup>+</sup>) (Figure S1A). Immunofluorescence staining showed that isolated fibroblasts expressed alpha-smooth muscle actin ( $\alpha$ -SMA) (Figure S1B).

We isolated primary epithelial ovarian cancer cells (OC8) from a patient with HGSOC (Cui et al., 2013). TP53 mutation is a feature of HGSOC (Domcke et al., 2013). We sequenced TP53 gene in OC8 and found that OC8 carried a hotspot TP53 mutation on exon 6 (Figure S1C; Table S2) (Soussi et al., 2010). Next, we inoculated the mixture of GFP-labeled OC8 and primary fibroblasts into female NOD.SCID  $\gamma$ c-deficient (NSG) mice and treated the mice with cisplatin. Fibroblasts had minimal effect on tumor volume in the control mice that were not treated with cisplatin (Figure 1A). However, tumor volume was increased in the cisplatin-treated mice injected with both OC8 and fibroblasts, compared with the cisplatin-treated mice injected with OC8 alone (Figure 1A). TUNEL assay demonstrated less cisplatin-induced apoptosis in tumor cells in the presence of fibroblasts (Figure 1B).

A2780 ovarian cancer cells are used in cisplatin resistance studies. Whether A2780 are HGSOC may be controversial (Domcke et al., 2013). We mixed fibroblasts with A2780 and inoculated subcutaneously into nude mice and treated the mice with cisplatin. Similar to the OC8 model, fibroblasts protected A2780 from cisplatin-mediated apoptosis (Figures 1C and 1D). Immunohistochemistry demonstrated the existence of SMA<sup>+</sup> fibroblasts in tumors established by injection of both fibroblasts and cancer cells (Figure S1D). Thus, fibroblasts enhance cisplatin resistance in ovarian cancer cells in vivo.

When we co-cultured A2780 with fibroblasts in vitro, we found that fibroblasts protected tumor cells from cisplatin-induced apoptosis as shown by reduced proportion of Annexin V<sup>+</sup> tumor cells (Figure 1E) in a dose-dependent manner (Figure S1E). To further investigate if the protective effects from fibroblasts required cell-to-cell contact, we cultured A2780 with fibroblasts in a Transwell and observed that all three fibroblast samples protected A2780 from cisplatin-induced apoptosis (Figure 1F). We observed similar protective effects of fibroblasts on OC8 (Figure 1G) and NIH:OVCAR3 (Figure 1H), another p53 mutant HGSOC cell (Table S2) (Domcke et al., 2013), and cisplatin-sensitive TOV21G ovarian cancer cells (Figure S1F). We collected serum-free culture medium from fibroblasts (fibroblast medium) and performed identical experiments. Fibroblast medium also protected A2780 and OC8 from cisplatin-induced apoptosis (Figures 1I and 1J). We extended our studies to include carboplatin and oxaliplatin and observed similar results (Figures S1G and S1H). Thus, fibroblasts release soluble factor(s) and promote platinum resistance in ovarian cancer cells.

### CD8<sup>+</sup> T Cells Abolish Fibroblast-Mediated Chemoresistance by IFN $\gamma$

The presence of CD8<sup>+</sup> T cells is associated with prolonged survival in cisplatin-treated ovarian cancer patients (Zhang et al., 2003; Zhao et al., 2016). To examine the potential involvement of CD8<sup>+</sup> T cells in fibroblast-mediated platinum resistance, we collected the supernatants from activated CD8<sup>+</sup> T cells and added it into the fibroblast and ovarian cancer cell co-culture system. We found that CD8<sup>+</sup> T cell-derived supernatants abolished the protective effects of fibroblasts on cisplatin-induced apoptosis in tumor cells (Figure 2A). We next pre-treated fibroblasts with CD8<sup>+</sup> T cell supernatants and again fibroblasts lost the protective function on cancer cells treated with cisplatin (Figures 2B and S2A). The fibroblast numbers (Figure S2B) and viability (Figure S2C) were not changed by CD8<sup>+</sup> T cell supernatants.

IFN $\gamma$  is a major effector cytokine produced by CD8<sup>+</sup> T cells. We detected high levels of IFN $\gamma$  in the activated CD8<sup>+</sup> T cell-derived supernatants (Figure 2C). We hypothesized that CD8<sup>+</sup> T cell-derived IFN $\gamma$  abolished the protective effect of fibroblasts. To test this, we pre-treated the fibroblasts with IFN $\gamma$  and observed more apoptotic A2780 (Figure 2D) or OC8 (Figure 2E) cells in the cultures containing IFN $\gamma$ -primed fibroblasts compared to control fibroblasts. IFN $\gamma$  treatment had no effect on fibroblast cell numbers or apoptosis (Figures S2B and S2C). Moreover, we cultured fibroblasts with CD8<sup>+</sup> T cell supernatant in the presence of neutralizing anti-IFN $\gamma$  receptor 1 (IFNGR1) antibody (Figure 2F) or JAK inhibitor I (Figure 2G). IFN $\gamma$  signaling blockade restored the protective effect of fibroblasts on cisplatin-induced tumor cell apoptosis (Figures 2F and 2G). Thus, effector CD8<sup>+</sup> T cells abolish fibroblast-mediated chemoresistance through the IFN $\gamma$  signaling pathway.

We further tested the effect of IFN $\gamma$  on fibroblast-mediated cisplatin resistance in the OC8 bearing NSG model in vivo. IFN $\gamma$  administration had no effect on tumor volume (Figure 2H). However, IFN $\gamma$  administration increased the therapeutic efficacy of cisplatin treatment as shown by reduced tumor volume (Figure 2H). Thus, IFN $\gamma$  diminishes fibroblast-mediated platinum resistance in vivo.

### Fibroblasts Reduce Platinum Intracellular Content in Cancer Cells

Cisplatin induces cytotoxicity mainly through DNA damage-mediated apoptosis (Wang and Lippard, 2005). To uncover the molecular mechanism of fibroblast-mediated cisplatin resistance, we first examined whether fibroblasts change the cisplatin-induced apoptotic signaling pathway in cancer cells. Cisplatin treatment activated caspase 3 and caspase 9 in A2780, while the presence of fibroblasts reduced their activation (Figure S3A). Cisplatin causes DNA crosslinking and stimulates H2AX phosphorylation at Serine 139 to generate  $\gamma$ H2AX as a major marker for DNA damage signaling in response to DNA

(F–H) Cisplatin-induced apoptosis in A2780 (F), OC8 (G), or NIH: OVCAR3 (H) co-cultured with fibroblasts from different ovarian cancer patients in the Transwell. Mean  $\pm$  SD; n = 3, \*p < 0.05.

(I and J) Cisplatin-induced apoptosis on A2780 (I) or OC8 (J) cultured in fibroblast medium. Mean  $\pm$  SD; n = 3, \*p < 0.05.

See also Figure S1 and Table S2.

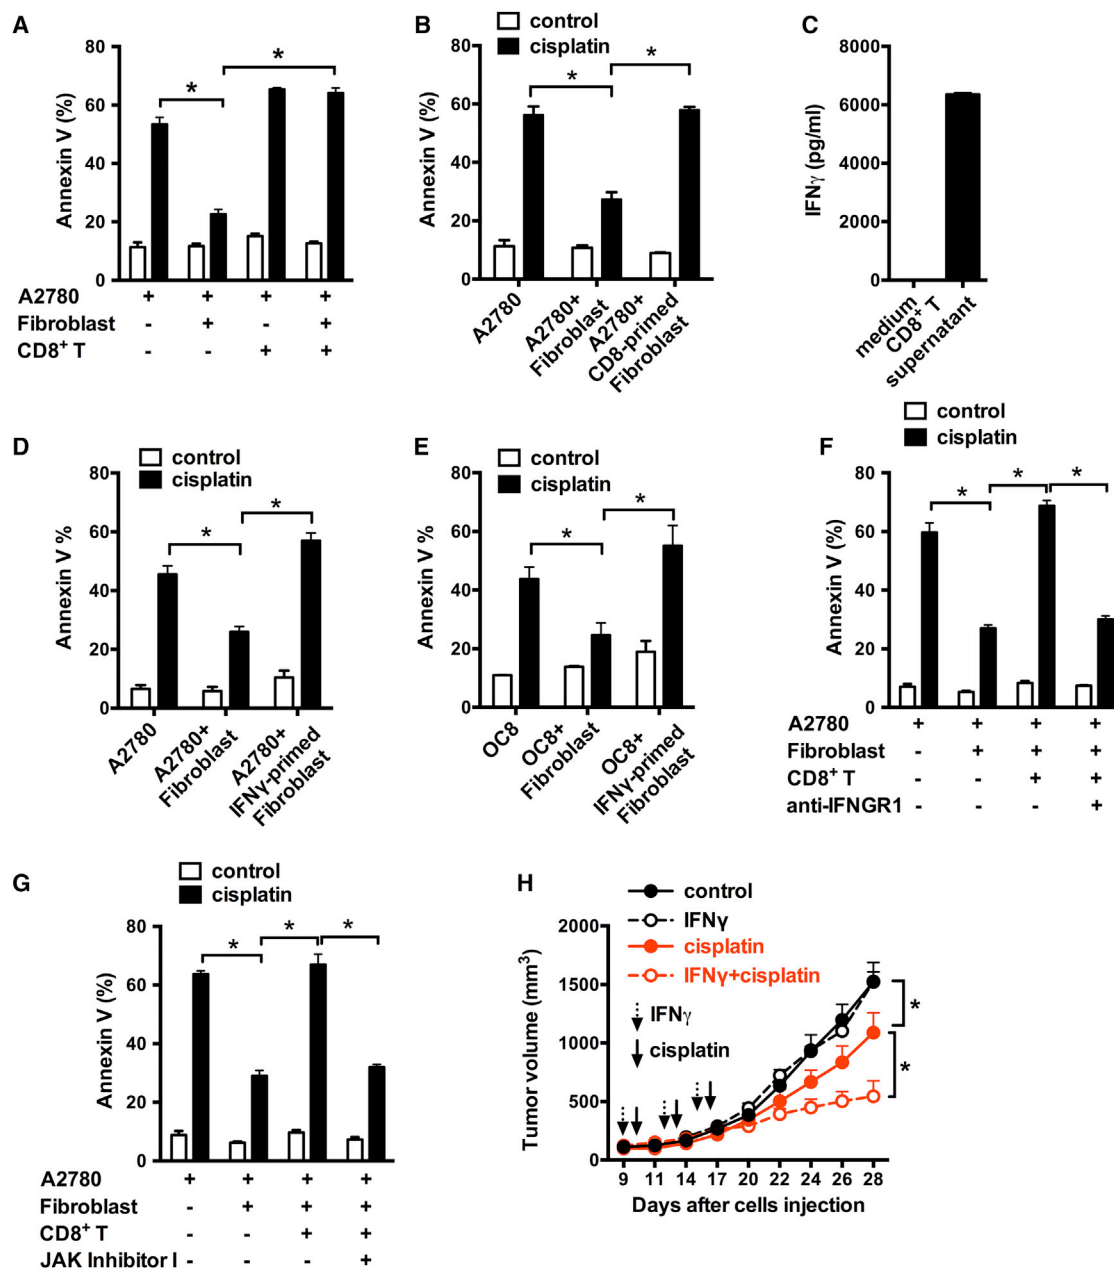

**Figure 2. CD8<sup>+</sup> T Cells Abolish Fibroblast-Induced Platinum Resistance via IFN $\gamma$**

(A and B) Effect of CD8<sup>+</sup> T cells on fibroblast-induced platinum resistance. A2780 and fibroblasts were cultured with the supernatant from activated CD8<sup>+</sup> T cells (A). Fibroblasts were primed with CD8<sup>+</sup> T cell supernatants and cultured with tumor cells in the presence of cisplatin (B). Tumor cell apoptosis was determined by Annexin V staining. Mean  $\pm$  SD; n = 3, \*p < 0.05.

(C) IFN $\gamma$  released by activated CD8<sup>+</sup> T cells. Mean  $\pm$  SD; n = 3.

(D–G) Effect of IFN $\gamma$  on fibroblast-induced platinum resistance. Fibroblasts were primed with IFN $\gamma$  (D and E) or with CD8<sup>+</sup> T cells supernatant in the presence of anti-IFN $\gamma$  R1 (F) or JAK inhibitor I (G) and subsequently cultured with tumor cells in the Transwell. Cisplatin-induced tumor cell apoptosis was determined. Mean  $\pm$  SD; n = 3, \*p < 0.05.

(H) Effect of IFN $\gamma$  on fibroblast-induced cisplatin resistance to OC8 in vivo. OC8 and fibroblasts were inoculated subcutaneously into NSG mice and then treated with IFN $\gamma$ , cisplatin, or IFN $\gamma$  + cisplatin for three cycles. Tumor volume was monitored (mean  $\pm$  SEM, n = 5). \*p < 0.05.

See also Figure S2.

double-strand break (Revet et al., 2011). When ovarian cancer cells were cultured with fibroblasts, cisplatin-triggered  $\gamma$ H2AX in A2780, OC8, and OVCAR3 was reduced (Figure 3A). Immuno-

fluorescence staining confirmed that fibroblast medium also reduced  $\gamma$ H2AX in cisplatin-treated A2780 (Figure S3B). Moreover, immunohistochemistry revealed that in the fibroblast and

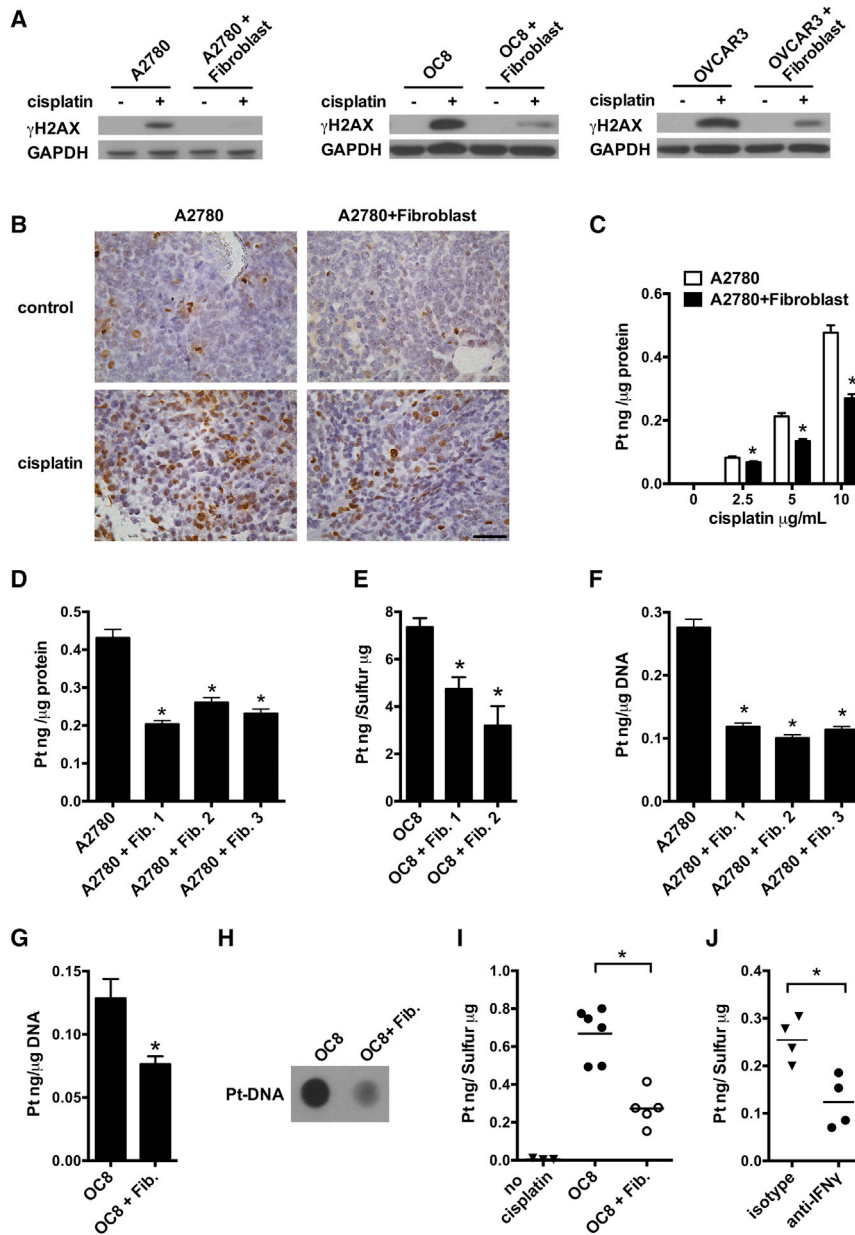

**Figure 3. Fibroblasts Reduce the Accumulation of Cisplatin in Cancer Cells**

(A) Cisplatin-induced  $\gamma$ H2AX in cancer cells cultured with fibroblasts was detected by western blotting. Fibroblasts were from four patients. One of three experiments is shown.

(B) Cisplatin-induced  $\gamma$ H2AX in vivo was determined in A2780 tissues and representative images are shown. Scale bar, 50  $\mu$ m.

(C–E) Effect of fibroblasts on cisplatin intracellular content in tumor cells. A2780 (C and D) or OC8 (E) were cultured with fibroblasts in the presence of different concentrations of cisplatin (C) or 10  $\mu$ g/ml cisplatin (D and E). Platinum content in the whole tumor cells was measured by ICP-MS in triplicate (mean  $\pm$  SD). \* $p$  < 0.05.

(F and G) Effect of fibroblasts on cisplatin DNA content in A2780 (F) or OC8 (G). Platinum content in the genomic DNA was measured by ICP-MS in triplicate (mean  $\pm$  SD). \* $p$  < 0.05.

(H) Dot blot assay of cisplatin-DNA adduct in genomic DNA of OC8 cultured with fibroblasts in the presence of cisplatin.

(I) Effect of fibroblasts on cisplatin content in tumor cells in vivo. GFP<sup>+</sup> OC8 were enriched from xenograft tumor tissues and platinum content was measured by ICP-MS (n = 5 or 6). \* $p$  < 0.05.

(J) Effect of IFN $\gamma$  blockade on tumor cisplatin content in vivo. GFP<sup>+</sup> OC8 and fibroblasts were inoculated into NSG mice with CD8<sup>+</sup> T cells. The mice were treated with cisplatin and anti-human IFN $\gamma$  blocking antibody or control antibody. GFP<sup>+</sup> OC8 were enriched and platinum content was measured by ICP-MS (n = 4). \* $p$  < 0.05.

See also Figure S3.

ovarian tumor cell co-injection animal model (Figure 1), fibroblasts led to decreased levels of  $\gamma$ H2AX in tumor cells following cisplatin treatment (Figure 3B). Thus, fibroblasts may control cisplatin resistance in cancer cells at the DNA damage induction level.

Reduced intracellular cisplatin content can be linked to less DNA damage (Galluzzi et al., 2012; Wang and Lippard, 2005). Inductively coupled plasma-high resolution mass spectrometry (ICP-MS) measurement revealed that intracellular cisplatin content was reduced in whole A2780 cells in the presence of fibroblasts with different concentrations of cisplatin (Figure 3C). Similar effects were observed in A2780 (Figure 3D) and OC8 (Figure 3E) using fibroblasts from several clinical specimens. Diminished cisplatin content was also detected in the genomic DNA of

cisplatin-treated A2780 (Figure 3F) and OC8 (Figure 3G) cultured with fibroblasts. The presence of fibroblast-conditioned medium from different ovarian cancer patients also resulted in diminished cisplatin accumulation in the genomic DNA of cisplatin-treated tumor cells (Figure S3C). Using an antibody specific for cisplatin-DNA adducts, we found that cisplatin-DNA adduct formation in OC8 was decreased in the presence of fibroblasts

(Figure 3H). In support of this observation, fibroblasts led to decreased tumor cell accumulation of cisplatin (Figure 3I) in tumor cells in cisplatin-treated mice (OC8-NSG model) (Figure S3D). Thus, fibroblasts confer cisplatin-resistance in ovarian cancer cells by reducing intracellular cisplatin accumulation.

To further investigate the causal link between CD8<sup>+</sup> T cell-derived IFN $\gamma$  and cisplatin tumor accumulation in vivo, we adoptively transferred CD8<sup>+</sup> T cells into the mice bearing tumors established with a mixture of tumor cells and fibroblasts and treated the mice with anti-human IFN $\gamma$  antibody and cisplatin. Twenty-four hours after the treatment, we enriched GFP-labeled tumor cells (Figure S3D) and found platinum content was reduced by anti-human IFN $\gamma$  (Figure 3J). Thus, fibroblasts confer

cisplatin-resistance in ovarian tumor cells by reducing intracellular cisplatin accumulation and CD8<sup>+</sup> T cell-derived IFN $\gamma$  abolishes this effect.

### Fibroblast-Mediated Chemoresistance Is Linked to Intracellular Glutathione Level

We dissected the mechanisms by which fibroblasts reduce cisplatin intracellular accumulation. Intracellular cisplatin content is regulated through cisplatin influx or efflux transporters (Wang and Lippard, 2005). We found that fibroblasts neither decreased the expression of cisplatin influx transporters nor increased the expression of cisplatin efflux transporters in tumor cells (Figure S4A). Cisplatin can be chelated by glutathione and the glutathione (GSH)-platinum complex subsequently effluxes from the cell (Chen and Kuo, 2010). We observed that after coculture with fibroblasts, the intracellular GSH level was increased in A2780 (Figure 4A), OC8 (Figure 4B), and OVCAR3 (Figure S4B). Similarly, fibroblast medium increased the intracellular GSH level in tumor cells compared to fresh culture medium and tumor cell medium (Figure 4C).

Next, we investigated whether intracellular GSH level in tumor cells affected their apoptotic response to cisplatin. N-acetyl cysteine (NAC) is a GSH precursor. Buthionine sulfoximine (BSO) is an inhibitor of glutamate-cysteine ligase, the first rate-limiting enzyme of glutathione synthesis. NAC increased intracellular GSH level (Figure 4D), decreased the level of cisplatin-induced  $\gamma$ , de (Figure 4E), reduced platinum content in genomic DNA (Figure 4F), and protected ovarian tumor cells from cisplatin-induced apoptosis (Figure S4C). BSO treatment decreased intracellular GSH level (Figure 4G), increased platinum DNA content (Figure 4H), and promoted cisplatin-induced apoptosis (Figure 4I) in A2780. Similarly, BSO treatment increased cisplatin-induced apoptosis in OC8 (Figure S4D) and OVCAR3 (Figure S4E). Treatment with NAC or BSO in the absence of cisplatin had no effect on the viability of A2780, OC8, and OVCAR3 (Figures 4I and S4C–S4E). Next, we constructed a short hairpin RNA (shRNA) vector to downregulate the expression of glutamate-cysteine ligase catalytic subunit (GCLC) in A2780. shGCLC downregulated the protein expression of GCLC (Figure S4F), decreased intracellular GSH level (Figure 4J), and promoted cisplatin-induced apoptosis (Figure 4K).

GSH monoester is utilized to regulate intracellular GSH levels (Mårtensson and Meister, 1989). We found that GSH monoester reduced tumor accumulation of cisplatin in vivo (Figure 4L). Accordingly, tumor volume was increased in mice treated with GSH monoester plus cisplatin as compared to cisplatin treatment alone (Figure 4M). Thus, GSH monoester diminished the therapeutic efficiency of cisplatin in ovarian tumors in vivo. Altogether, fibroblast-mediated chemoresistance is linked to high intracellular GSH in ovarian cancer cells.

### Fibroblast-Derived GSH and Cysteine Confer Chemoresistance in Tumor Cells

Fibroblasts release soluble factor(s), elevate intracellular GSH, and reduce intracellular cisplatin content in tumor cells. To identify these fibroblast-released factor(s), we divided the fibroblast medium or tumor cell medium (control) into two fractions based

on a 3 kDa molecular weight cutoff filter. We found that the fraction with <3 kDa molecular size, but not the fraction with >3 kDa molecular size, inhibited cisplatin-induced apoptosis (Figure 5A) and increased intracellular GSH level (Figure 5B) in A2780. When fibroblast medium was incubated with dextran-coated charcoal for removing hormones and steroids, the protective effect was diminished (Figure S5A). When fibroblast medium was treated with trypsin or proteinase K digestion, the protective effect was not changed (Figure S5B). Thus, the fibroblast factor(s) may be small molecules, rather than protein(s) or large peptide(s).

Given that fibroblast medium increased tumor cell intracellular GSH level, we hypothesized that the fibroblast-derived small molecule(s) were related to GSH metabolism. GSH is the major thiol-containing component synthesized de novo in mammalian cells (Lushchak, 2012). We detected higher levels of thiols in fibroblast medium than in fresh culture medium or in A2780 medium (Figure 5C). Fibroblast medium contained 25–50  $\mu$ M GSH compared to <1  $\mu$ M GSH in fresh medium and in A2780 medium (Figure 5D). We confirmed high GSH levels in fibroblast medium from six additional patient samples (Figure S5C). These data suggest that in addition to GSH, there are other thiol component(s) in the fibroblast medium. GSH, cysteine, cysteine-glycine (Cys-Gly), and  $\gamma$ -glutamyl-cysteine ( $\gamma$ -Glu-Cys) are four thiol-containing metabolites. We measured these metabolites by liquid chromatography-mass spectrometry (LC-MS) (Figures S5D and S5E). We detected <3  $\mu$ M of cysteine-glycine and  $\gamma$ -glutamyl-cysteine in all mediums, <10  $\mu$ M of cysteine in fresh medium and tumor medium, and 70–100  $\mu$ M of cysteine in fibroblast medium (Figure 5E). Thus, the major thiol components in fibroblast medium are GSH and cysteine. Fibroblast-derived GSH and cysteine may mediate the protective effect from cisplatin-induced tumor apoptosis. We showed that exogenous GSH (Figures 5F–5H) and cysteine (Figures 5I–5K) increased intracellular levels of GSH (Figures 5F and 5I), decreased platinum DNA accumulation (Figures 5G and 5J), and protected ovarian tumor cells from cisplatin-induced apoptosis (Figures 5H and 5K).

Cystine is a precursor of cysteine, which is the rate-limiting substrate for GSH synthesis (Zhang et al., 2012). Hence, we hypothesized that manipulation of cystine would alter levels of endogenous GSH and cysteine in fibroblasts and consequently impact their protective effect on tumor cells. To this end, we generated fibroblast medium with or without cystine (cystine<sup>+</sup> or cystine<sup>-</sup>) complementation. We showed that cystine deficiency (cystine<sup>-</sup>) resulted in dramatic reduction of total thiol (Figure 5L) and GSH (Figure 5M) in fibroblast medium. Functionally, cystine<sup>+</sup>, but not cystine<sup>-</sup>, fibroblast medium reduced Annexin V<sup>+</sup> tumor cells in response to cisplatin (Figure 5N). Therefore, fibroblasts utilize cystine to generate and release cysteine and GSH, which leads to tumor cell uptake of cysteine and GSH to elevate intracellular GSH, ultimately resulting in cisplatin resistance.

### CD8<sup>+</sup> T Cells Alter GSH/Cystine Metabolism and xCT Expression in Fibroblasts

Fibroblast-mediated cisplatin resistance was abolished by IFN $\gamma$  and CD8<sup>+</sup> T cells (Figure 2). Next, we tested whether IFN $\gamma$  and CD8<sup>+</sup> T cells targeted GSH and cysteine metabolism



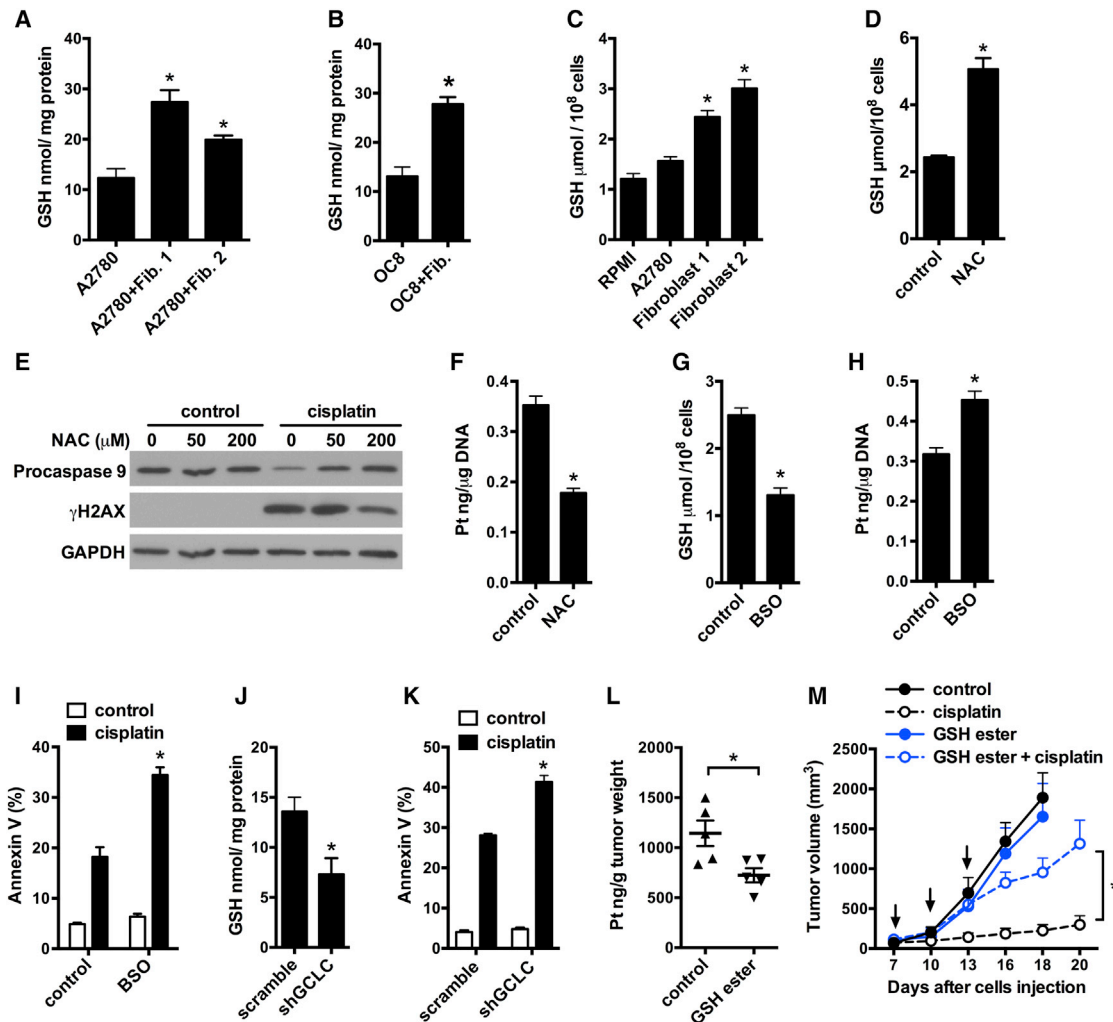

**Figure 4. Fibroblasts Elevate Cancer Intracellular GSH Conferring Platinum Resistance**

(A and B) Intracellular GSH level in A2780 (A) or OC8 (B) co-cultured with fibroblasts. Mean  $\pm$  SD, n = 3, \*p < 0.05.

(C) Intracellular GSH level in A2780 cultured in control or fibroblast medium. Mean  $\pm$  SD, n = 3, \*p < 0.05.

(D) Intracellular GSH level in A2780 treated with 200  $\mu$ M NAC for 6 hr. GSH was measured in triplicate (mean  $\pm$  SD). \*p < 0.05.

(E and F) Effects of NAC on cisplatin-induced  $\gamma$ H2AX (E) and cisplatin content (F) in A2780. Pro-caspase 9 and  $\gamma$ H2AX were detected by western blotting (E). Platinum content in genomic DNA of A2780 was measured by ICP-MS in triplicates (mean  $\pm$  SD) (F). \*p < 0.05.

(G) Intracellular GSH level in A2780 treated with 6  $\mu$ M BSO for 6 hr. GSH was measured in triplicates (mean  $\pm$  SD). \*p < 0.05.

(H and I) Platinum content in genomic DNA (H) or cisplatin-induced apoptosis (I) of A2780. A2780 were pretreated with 6  $\mu$ M BSO for 6 hr. Mean  $\pm$  SD, n = 3, \*p < 0.05.

(J and K) Effects of GCLC knockdown on intracellular GSH level (J) and cisplatin-induced apoptosis (K) in A2780. GSH was measured and normalized with total protein. Apoptosis was determined by Annexin V staining. Mean  $\pm$  SD; n = 3, \*p < 0.05.

(L and M) Effect of GSH monoester on cisplatin resistance in vivo. Mice bearing A2780 ovarian cancer were treated with PBS (control) or GSH monoester for 8 hr and followed with cisplatin treatment for 24 hr. Platinum content in tumor tissue was measured by ICP-MS (L). For tumor volume monitoring, mice were treated with GSH monoester and cisplatin for three cycles (M) (mean  $\pm$  SEM, n = 5 tumors/group). \*p < 0.05.

See also Figure S4.

in fibroblasts. Treatment of fibroblasts with IFN $\gamma$  or CD8<sup>+</sup> T cell supernatants reduced the total thiol (Figures 6A and S6A) and GSH (Figures 6B and S6B) in fibroblast medium. Neutralizing anti-IFNGR1 antibody disabled the effects of CD8<sup>+</sup> T cells on fibroblasts-derived thiol and GSH (Figures S6A and S6B).

Gamma-glutamyltransferases (GGT), the only enzyme of the gamma-glutamyl cycle present on the cell membrane, controls GSH homeostasis by breaking down extracellular GSH (Lush-

chak, 2012). We observed that IFN $\gamma$  stimulated the mRNA expression of GGT5 (Figure 6C) and increased the GGT enzymatic activity in fibroblasts (Figure 6D), but not in tumor cells (Figures S6C and S6D). Moreover, we found positive correlations between GGT5, CD8 (Figure S6E), and an IFN $\gamma$  responsive gene, interferon regulatory factor 1 (IRF1) expression (Figure S6F) in the microdissected stroma compartments from HGSOc specimens (GEO: GSE40595) (Yeung et al., 2013). We further explored

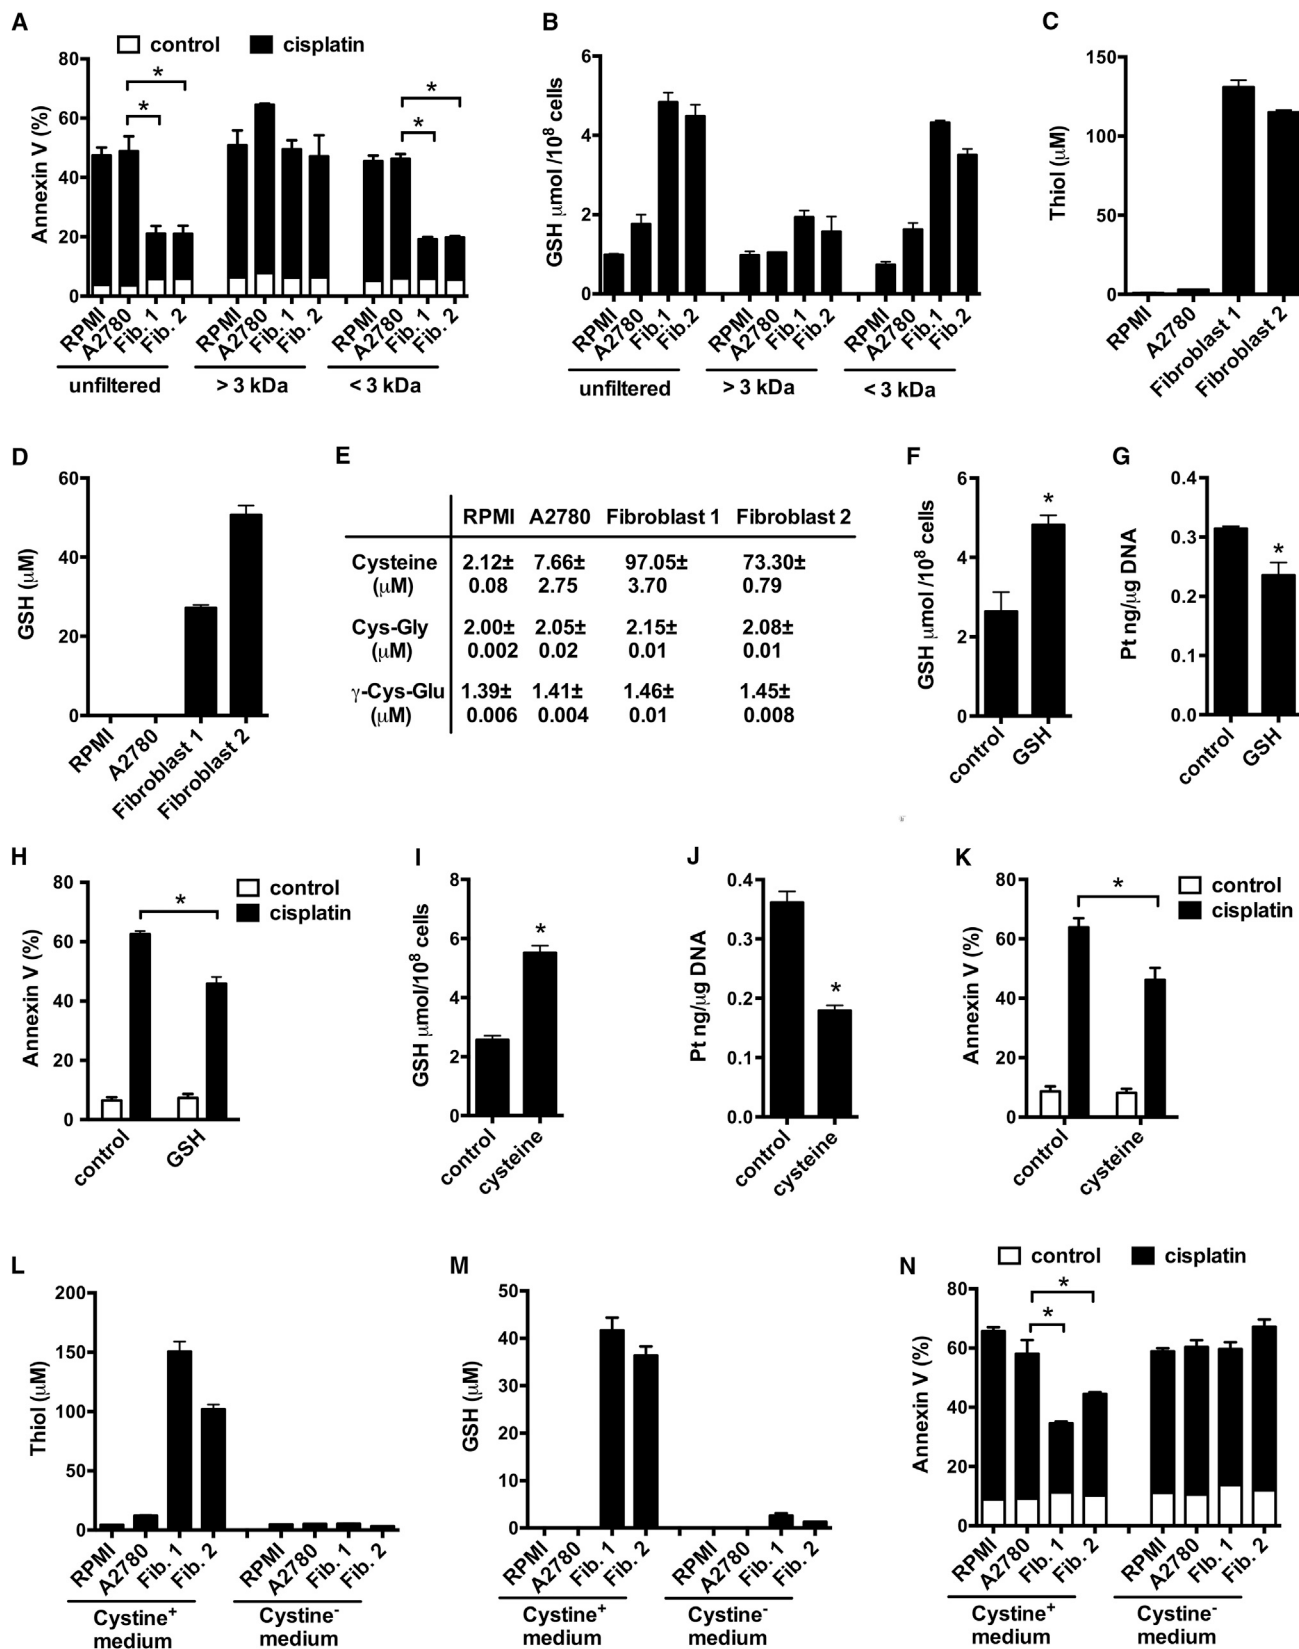

(legend on next page)



the importance of IFN $\gamma$ -stimulated GGT5 expression in fibroblast-mediated cisplatin resistance by knocking down GGT5 expression in fibroblasts. Fibroblasts expressing shGGT5 and scrambled shRNA similarly protected tumor cells from cisplatin-induced apoptosis (Figures 6E and S6G). IFN $\gamma$  treatment abolished the protective function of fibroblasts expressing scrambled shRNA and partially reversed this protective function of fibroblasts expressing shGGT5 (Figure 6E). These data suggest that IFN $\gamma$  targets GGT5 in fibroblasts to accelerate GSH degradation and in turn partially reduces the protective activity of fibroblasts on cisplatin-induced tumor cell apoptosis.

Next, we analyzed whether IFN $\gamma$  and CD8 $^+$  T cells could regulate cysteine level in fibroblasts. We measured both cysteine and cystine (Figures S6H and S6I) with LC-MS in the cultured fibroblast medium. IFN $\gamma$  treatment reduced cysteine and increased cystine in fibroblast medium (Figure 6F). This suggests that IFN $\gamma$  treatment slows down cysteine synthesis by reducing cysteine consumption in fibroblasts. Treatment with IFN $\gamma$  or CD8 $^+$  T cell supernatants resulted in decreased  $^{14}$ C-cystine uptake in fibroblasts at multiple time points (Figures 6G and S6J), but not in tumor cells (Figure S6K). To further evaluate the effects of CD8 $^+$  T cells on fibroblast-mediated chemoresistance, we pretreated fibroblasts with IFN $\gamma$  and found that these fibroblasts restored intracellular cisplatin accumulation (Figure 6H) and cisplatin-induced  $\gamma$ H2AX expression (Figure 6I) in tumor cells.

System xc $^-$  cystine/glutamate antiporter is a membrane amino acid transporter that mediates the exchange of extracellular cystine and intracellular glutamate, which is a heterodimer composed of the 4F2 heavy chain (SLC3A2) and the light chain xCT (Ishimoto et al., 2011). We found that the expressions of xCT and SLC3A2 protein were both reduced by IFN $\gamma$  in fibroblasts (Figure 6J). Knockdown of xCT expression in fibroblasts attenuated fibroblast-mediated cisplatin resistance in A2780 (Figure 6K). The effect of IFN $\gamma$  on regulation of system xc $^-$  is cell-type-specific. IFN $\gamma$  treatment had no effect on xCT and SLC3A2 expressions in tumor cells (Figure S6L). Cystine transporter xCT expression was higher in fibroblasts than tumor cells (Figure S6M). Thus, IFN $\gamma$  restricts the production of cysteine and promotes the degradation of GSH in fibroblasts through down-regulating system xc $^-$  and upregulating GGT expression and consequently abrogates the protective effects of fibroblasts on cisplatin-induced apoptosis in tumor cells.

We dissected the mechanism by which IFN $\gamma$  regulated system xc $^-$  and GGT expression in fibroblasts. We monitored the dy-

namic expression of xCT, SLC3A2, and GGT5 mRNA in fibroblasts upon IFN $\gamma$  treatment. Twenty-four hours after IFN $\gamma$  treatment, we detected a moderate increase in the expression of GGT5 mRNA (Figure 6L). However, the expression of xCT, but not SLC3A2 mRNA, was sharply decreased within 4 hr of IFN $\gamma$  treatment and continued to decrease during the experimental time period (Figure 6L). In contrast, expression of the classical IFN $\gamma$  responsive genes IRF1 and CXCL10 rapidly increased within 4 hr (Figure S6N). Given the rapid and potent changes in xCT and high expression of xCT in fibroblasts, we particularly focused on xCT regulation by IFN $\gamma$ .

Rapid downregulation of xCT mRNA by IFN $\gamma$  suggests a potential direct transcriptional regulation at the levels of pre-mRNA and/or mature mRNA. We observed that the xCT pre-mRNA level was rapidly decreased in fibroblasts within 30 min of IFN $\gamma$  treatment and continued to decrease following the experimental time period (Figures 6M and S6O). CXCL10 pre-mRNA was rapidly induced by IFN $\gamma$  (Figure S6P). We then conducted a RNA polymerase II (Pol II) chromatin immunoprecipitation (ChIP) assay. RNA Pol II occupancy at the transcription start site was comparable in fibroblasts treated with or without IFN $\gamma$ ; however, the occupancy in xCT intragenic regions was attenuated after IFN $\gamma$  treatment (Figures 6N and S6O). In addition, IFN $\gamma$  had no effect on the Pol II occupancy at both TSS and intragenic regions of xCT in OC8 (Figure S6Q). Thus, IFN $\gamma$  treatment had no effect on RNA Pol II loading onto xCT promoter, but potentially decreased elongation of RNA Pol II into xCT gene body, and ultimately resulted in xCT transcriptional repression in fibroblasts.

Janus kinase (JAK) and STAT1 mediate cellular response to IFN $\gamma$  stimulation. We observed that IFN $\gamma$  induced STAT1 phosphorylation in fibroblasts within 5 min and increased IRF1 protein expression within 2 hr, but decreased xCT protein expression within 8 hr (Figure 6O). JAK inhibitor I reversed IFN $\gamma$ -mediated downregulation of xCT pre-mRNA and mature mRNA in fibroblasts (Figure S6R). STAT1 homodimers bind to DNA at the gamma interferon activation site (GAS) of the consensus sequence. We analyzed the STAT1 ChIP sequencing (ChIP-seq) database of IFN $\gamma$ -stimulated K562 or HeLa cells in the ENCODE project. We found three potential STAT1 binding sites at the xCT promoter region: one at intron1 (GAS1), one near the TSS (GAS2), and one upstream of promoter (GAS3) (Figure 6P). We conducted STAT1 ChIP assay on fibroblasts and OC8. ChIP data demonstrated that IFN $\gamma$  exclusively

### Figure 5. Fibroblasts Release GSH and Cysteine Conferring to Cisplatin Resistance

(A and B) Cisplatin-induced apoptosis (A) and intracellular GSH (B) in A2780. Fibroblast medium was filtered into two fractions, >3 kDa and <3 kDa. Tumor cells were cultured with unfiltered or filtered fibroblast medium in the presence of cisplatin. Apoptosis and intracellular GSH in A2780 cells were measured. Mean  $\pm$  SD; n = 3, \*p < 0.05.

(C and D) Total thiol (C) and GSH (D) in fresh medium, A2780 medium, and fibroblast medium. Mean  $\pm$  SD, n = 3.

(E) Cysteine, Cys-Gly, and  $\gamma$ -Cys-Glu concentrations in fresh medium, A2780 medium, and fibroblast medium. Mean  $\pm$  SD, n = 3.

(F–K) Effects of exogenous GSH (F–H) and cysteine (I–K) on intracellular GSH level (F and I), cisplatin content (G and J), and cisplatin-induced apoptosis (H and K) in A2780. A2780 were pretreated with 50  $\mu$ M GSH or 100  $\mu$ M cysteine for 6 hr and followed with cisplatin treatment. Mean  $\pm$  SD; n = 3, \*p < 0.05.

(L–N) Effects of cysteine deficiency on fibroblast-generated thiol (L), GSH (M), and fibroblast-mediated tumor protection (N). Total thiol (L) and GSH (M) were measured in medium that were generated in cysteine complete (Cystine $^+$ ) or cysteine free (Cystine $^-$ ) culture. Mean  $\pm$  SD; n = 3. A2780 were incubated in Cystine $^+$  or Cystine $^-$  fibroblast medium for 6 hr and followed with cisplatin treatment. For Cystine $^-$  medium, 100  $\mu$ M cysteine was supplemented before A2780 were exposed to the medium. Tumor apoptosis was determined by Annexin V staining (N). Mean  $\pm$  SD; n = 3, \*p < 0.05.

See also Figure S5.

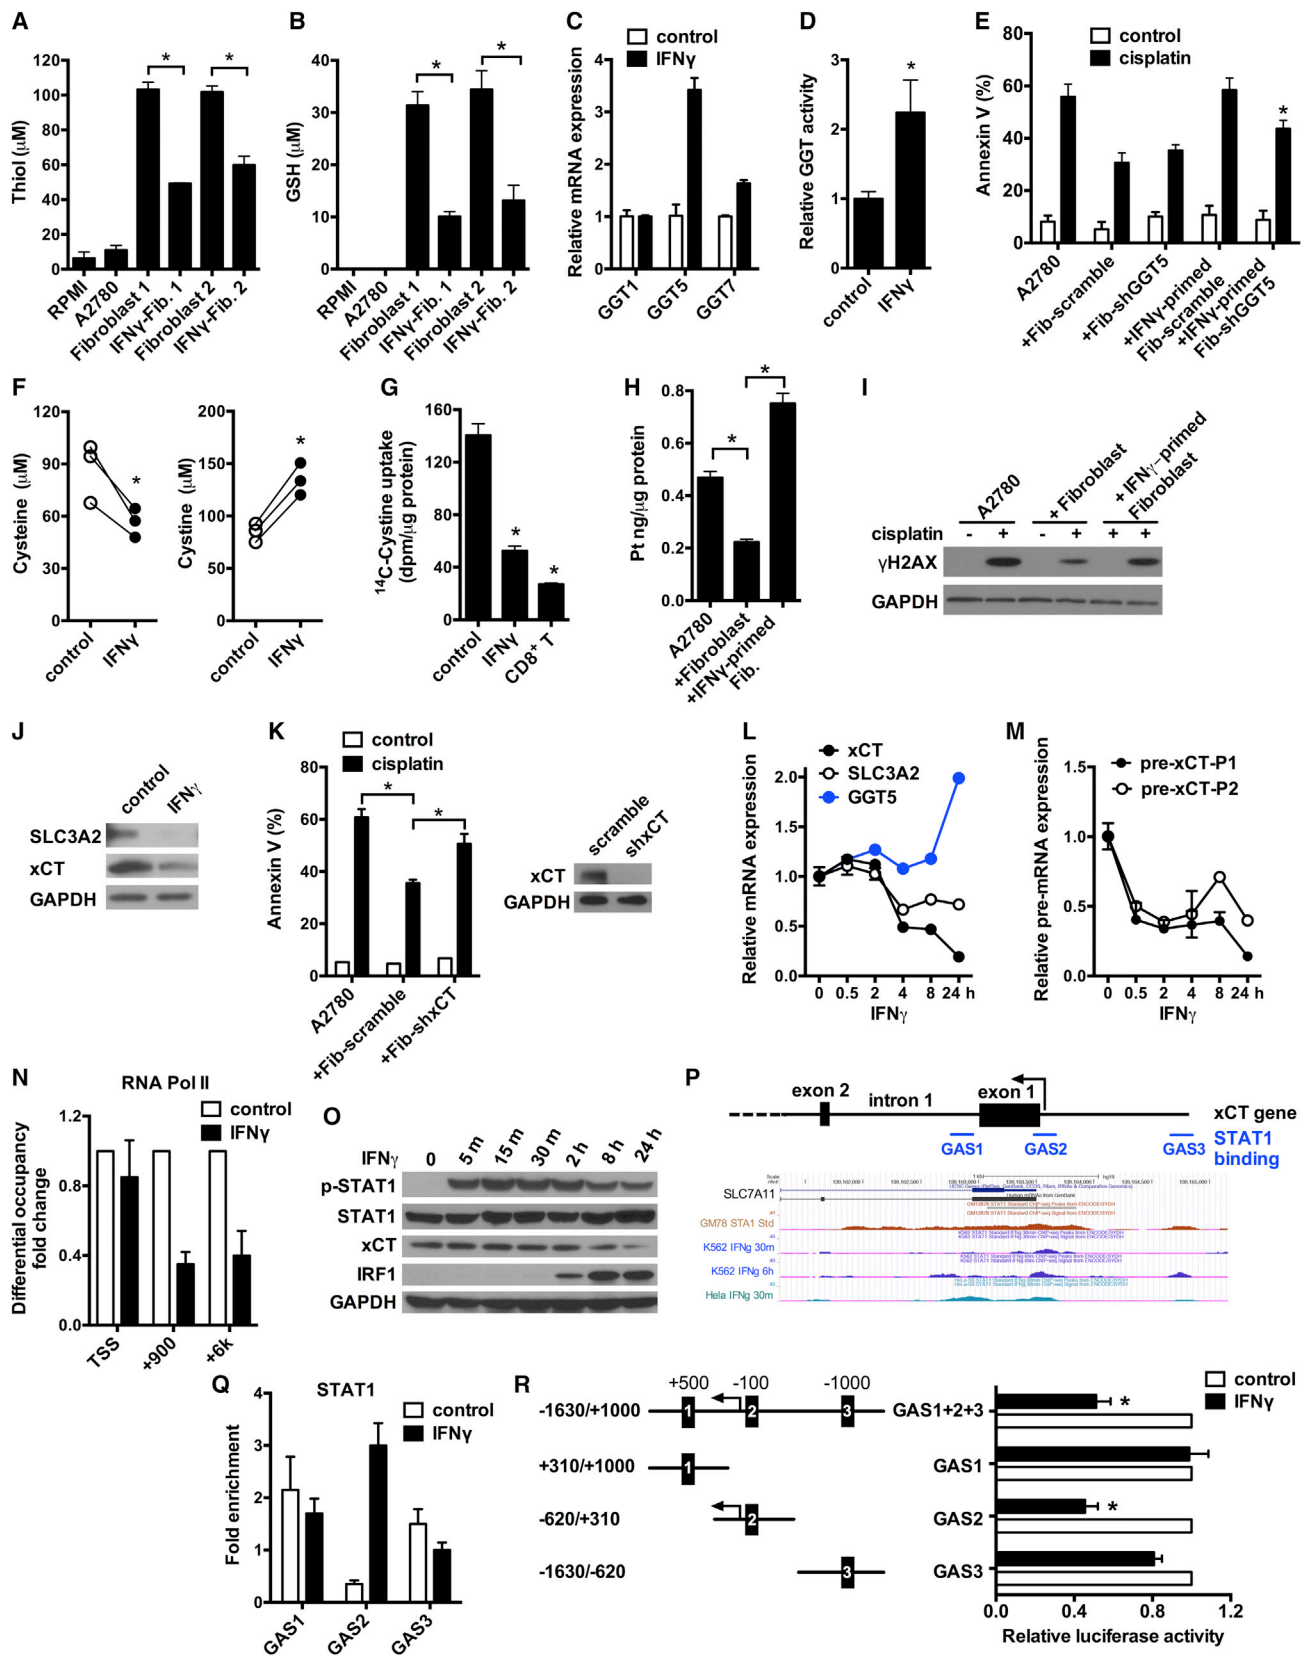

(legend on next page)

enhanced STAT1 binding to the GAS2 region in fibroblasts (Figure 6Q), while IFN $\gamma$  treatment resulted in increased STAT1 binding to both GAS1 and GAS2 regions in tumor cells (Figure S6S). To assess whether the GAS2 element in xCT promoter is involved in the regulation of xCT expression, we performed xCT promoter luciferase reporter assays. Similar to the full-length xCT promoter, the luciferase activity of reporter construct carrying GAS2, not GAS1 and GAS3, was repressed by IFN $\gamma$  treatment (Figure 6R). These results suggest that the GAS2 element near the xCT TSS may selectively be linked to IFN $\gamma$ -mediated xCT transcriptional repression in fibroblasts. Altogether, our data demonstrates that IFN $\gamma$  represses xCT transcriptional expression in fibroblasts.

### Clinical Impact of Fibroblasts and Stromal CD8<sup>+</sup> T Cells on Chemoresistance

Finally, we examined the relationship between stromal fibroblasts, chemoresistance, and potential association with stromal CD8<sup>+</sup> T cells in HGSOV patients whose clinical and pathological information was available (Table S3). Based on their responses to platinum-based chemotherapy, we divided patients into chemosensitive and chemoresistant groups. As expected, overall survival was much shorter in chemoresistant patients compared to chemosensitive patients (Figure 7A; Table S3).

Next, we quantified  $\alpha$ -SMA<sup>+</sup> fibroblasts in the tumor stroma with immunohistochemistry in ovarian tumor tissues (Figure S7A). Based on the stromal  $\alpha$ -SMA staining score, patients were divided into " $\alpha$ -SMA<sup>low</sup>" and " $\alpha$ -SMA<sup>high</sup>" groups. We observed that high stromal  $\alpha$ -SMA expression was associated with poor overall survival (Figure 7B; Table S3). We further observed that increased tumor stromal fibroblasts strongly correlated with chemoresistance (Table S4), and the proportion of high levels

of stromal fibroblasts were elevated in chemoresistant patients compared to chemosensitive patients (Figure 7C).

To determine whether the association between stromal fibroblasts and patient survival (Figure 7C) is linked to platinum response, we adjusted for platinum response and compared the significance of stromal fibroblasts using Cox's proportional hazard regression (Table S5). We found that stromal fibroblasts were not associated with patient survival when platinum resistance was included as a covariant in regression analysis (Table S5). Altogether, these data indicate that the levels of stromal fibroblasts in ovarian tumors correlate with platinum response and affect patient survival by modulating chemotherapeutic response.

We quantified CD8<sup>+</sup> T cells in the tumor stroma (Figure S7B). Based on the stromal CD8<sup>+</sup> T cell levels, patients were divided into "CD8<sup>low</sup>" and "CD8<sup>high</sup>" groups (Table S3). We observed that high levels of stromal CD8<sup>+</sup> T cells were associated with improved overall survival (Figure 7D). As we observed that CD8<sup>+</sup> T cells interacted with stromal fibroblasts and abrogated chemoresistance induced by fibroblasts (Figures 2 and 6) and noted that an increased proportion of fibroblasts correlated with diminished platinum response (Figure 7C) and shorter survival in patients (Figure 7B), we analyzed the clinical significance of these findings. We found that the levels of CD8<sup>+</sup> T cells were higher in the tumors of chemosensitive patients as compared to chemoresistant patients (Figure 7E; Table S6). Thus, the patients with high SMA who had high stromal CD8<sup>+</sup> T cells are more likely to respond to platinum-based chemotherapy as compared to patients with high SMA and low CD8<sup>+</sup> T cells (Table S6). Collectively, our results suggest that the density of stromal fibroblasts and CD8<sup>+</sup> T cells affect response to platinum-based chemotherapy and impacts patient survival.

### Figure 6. Effector CD8<sup>+</sup> T Cell-Derived IFN $\gamma$ Reduces GSH and Cysteine in Fibroblasts

- (A and B) Total thiol (A) and GSH (B) concentrations in samples. Fibroblasts were primed with 5 ng/ml IFN $\gamma$ . Mean  $\pm$  SD; n = 3, \*p < 0.05.
- (C) Real-time PCR quantification of GGT mRNAs in IFN $\gamma$ -treated fibroblasts. Data are presented as fold change relative to control group, n = 3, mean  $\pm$  SD.
- (D) GGT enzymatic activity in fibroblasts after 48 hr of IFN $\gamma$  treatment. Data are presented as fold change relative to control (mean  $\pm$  SD), n = 3, \*p < 0.05.
- (E) Role of GGT5 knockdown in IFN $\gamma$ -mediated protective effect. Fibroblasts expressing scramble shRNA or shGGT5 were primed with IFN $\gamma$ . A2780 were cultured with these fibroblasts and cisplatin-induced tumor apoptosis was determined. n = 3, mean  $\pm$  SD. \*p < 0.05.
- (F) Quantification of cysteine and cystine concentrations in fibroblast medium by LC-MS. Fibroblasts from three different patients were treated with IFN $\gamma$ . \*p < 0.05.
- (G) Effect of IFN $\gamma$  and CD8<sup>+</sup> T cell supernatants on <sup>14</sup>C-Cystine uptake by fibroblasts. Mean  $\pm$  SD, n = 3. \*p < 0.05.
- (H and I) Platinum content (H) and  $\gamma$ H2AX level (I) in A2780 cultured with IFN $\gamma$ -primed fibroblasts in the presence of cisplatin. The intracellular platinum was measured by ICP-MS. Mean  $\pm$  SD n = 3, \*p < 0.05. Tumor  $\gamma$ H2AX was detected by western blotting.
- (J) Representative immunoblots of xCT and SLC3A2 in fibroblasts treated with IFN $\gamma$  for 24 hr.
- (K) Effect of xCT knockdown on fibroblast-mediated cisplatin resistance. A2780 were cultured with fibroblasts expressing scramble shRNA or shxCT, and followed with cisplatin treatment. Tumor apoptosis was determined by Annexin V staining. n = 3, mean  $\pm$  SD. \*p < 0.05. The knockdown efficiency of shxCT was determined by western blotting.
- (L) Real-time PCR assays of mRNAs in fibroblasts treated with IFN $\gamma$  for different time points. Data are presented as fold change relative to control (mean  $\pm$  SD), n = 3.
- (M) Real-time PCR assays of xCT pre-mRNA in above fibroblasts. xCT pre-mRNA was analyzed with two different primer pairs and normalized to GAPDH pre-mRNA. Mean  $\pm$  SD, n = 3.
- (N) ChIP of RNA Pol II in fibroblasts treated with or without IFN $\gamma$ . RNA Pol II binding to xCT TSS and intragenic regions (+900 and +6 k) was quantified by qPCR. Results are expressed as the fold changes in site occupancy over control fibroblasts. Mean  $\pm$  SD from two fibroblasts samples.
- (O) IFN $\gamma$ -induced STAT1 phosphorylation and xCT downregulation in fibroblasts were determined by western blotting.
- (P) Graphics map showing the positions of primers used to quantify potential STAT1 binding sites around xCT promoter region. Lower panel shows UCSC genome browser tracks of the xCT promoter region with data for STAT1 ChIP-seq.
- (Q) ChIP of STAT1 in IFN $\gamma$ -treated fibroblasts. The binding of STAT1 to the three GAS regions around xCT promoter was determined. Results are expressed as the fold enrichment over IgG. Mean  $\pm$  SD from two fibroblasts samples.
- (R) Effect of xCT promoter GAS elements on luciferase activity. Fibroblasts were transfected with luciferase reporter constructs containing full-length xCT promoter (GAS1+2+3) or individual GAS elements. Luciferase activity was assessed after IFN $\gamma$  treatment and presented as the relative activity compared with controls (mean  $\pm$  SD). n = 3, \*p < 0.05.

See also Figure S6.

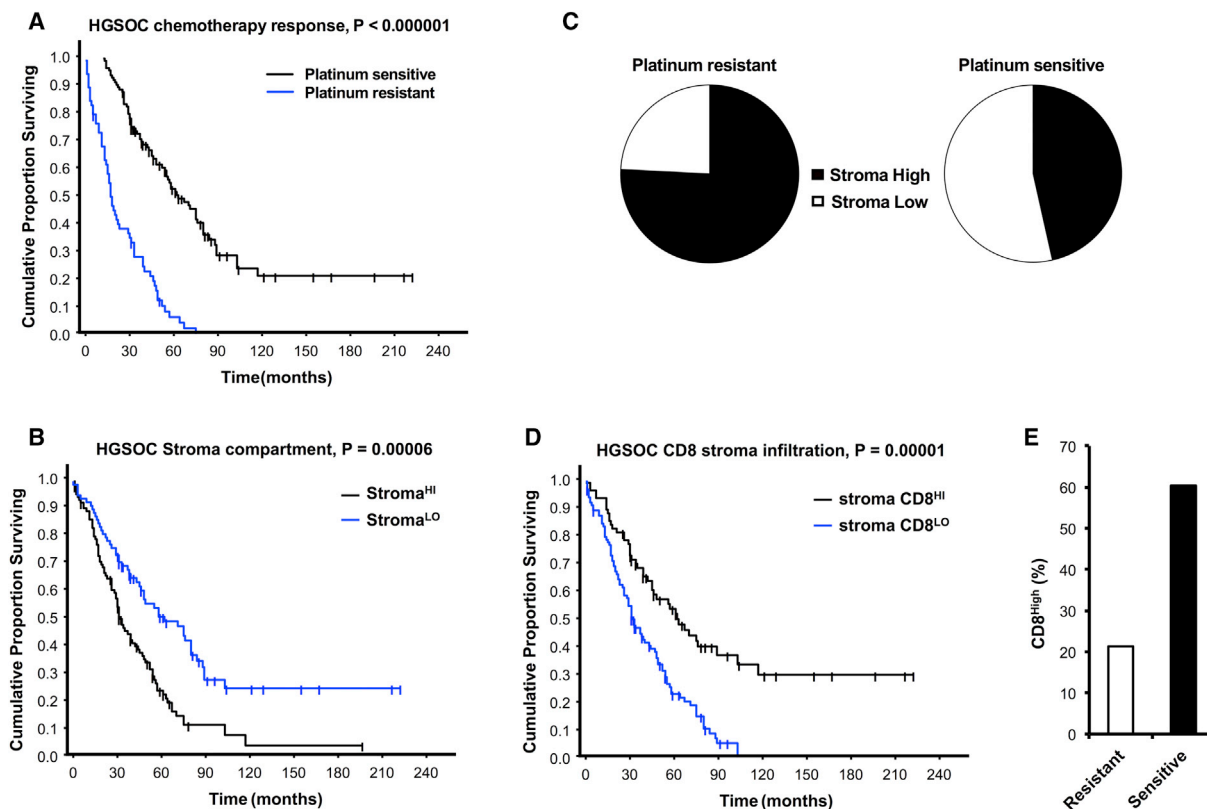

**Figure 7. Fibroblasts and Stromal CD8<sup>+</sup> T Cells Clinically Impact Chemoresistance**

(A) Impact of chemotherapeutic responses on patient outcome. Patients were divided into platinum-resistant and platinum-sensitive groups. The Kaplan-Meier curve of overall survival is shown ( $p < 0.0001$ ,  $n = 178$ ).

(B) Impact of stromal fibroblasts on patient outcome. Patients were divided into high and low stromal fibroblast groups. The Kaplan-Meier curve of overall survival is shown ( $p = 0.0026$ ,  $n = 176$ ).

(C) Association between the levels of stromal fibroblasts and platinum response. The proportion of stromal fibroblasts is shown in chemoresistant and chemosensitive patients (chi-square = 15.02,  $p = 0.0001$ ).

(D) Impact of stromal CD8<sup>+</sup> T cells on patient outcome. Patients were divided into high and low groups. The Kaplan-Meier curve of overall survival is shown ( $p < 0.0001$ ,  $n = 176$ ).

(E) Correlation between the levels of stromal CD8<sup>+</sup> T cells and platinum response in patients with high stromal fibroblasts. The proportion of stromal CD8<sup>+</sup> T cells is shown in chemoresistant and chemosensitive patients (Fisher's exact test,  $p = 0.0298$ ).

See also [Figure S7](#) and [Tables S3, S4, S5, and S6](#).

## DISCUSSION

Effector T cells, fibroblasts, and tumor cells are major cellular components in the tumor microenvironment. Effector T cell tumor trafficking and function shape tumor immunotherapy including PD-L1 blockade and adoptive T cell therapy (Peng et al., 2015). We have now demonstrated that effector T cells and the interaction between effector T cells and fibroblasts play a role in platinum-based chemoresistance and modulate chemotherapeutic response in patients with ovarian cancer.

Fibroblasts promote tumor progression through multiple mechanisms, including increased tumor cell proliferation, angiogenesis, invasion, sustain of stemness, and inhibition of tumor cell death (Kalluri and Zeisberg, 2006; Loeffler et al., 2006). We have found that primary cancer-associated fibroblasts confer resistance to platinum-based treatment in ovarian cancer cells. It has been reported that fibroblasts mediate carboplatin resis-

tance to pancreatic cancer cell lines (Straussman et al., 2012). We found that fibroblasts diminish cisplatin accumulation in ovarian cancer cells by releasing GSH and cysteine. Biological thiols have been suggested to regulate platinum sensitivity by decreasing DNA platinum accumulation in cultured tumor cells (Chen and Kuo, 2010; Kröning et al., 2000). GSH and cysteine are both involved in maintaining intracellular GSH hemostasis (Lushchak, 2012). Previous studies have suggested that intracellular GSH could react with cisplatin to form a Pt(GS)<sub>2</sub> conjugate and this Pt(GS)<sub>2</sub> may be eliminated across the membrane through the ATP-dependent glutathione S-conjugate export pump (Ishikawa and Ali-Osman, 1993). Moreover, biological thiols could directly react with platinum atoms to compete with DNA-platinum binding in both intracellular and extracellular reaction systems (Dabrowiak et al., 2002). In our study, we found that fibroblasts released thiols, elevated intracellular GSH levels, and reduced platinum DNA accumulation in tumor cells. Thus,



these findings establish a surprising non-genetic paradigm in shaping drug resistance: stromal fibroblasts alter thiol metabolism and control chemotherapeutic response in tumor cells. Clinically, stromal fibroblasts predict platinum-based therapeutic response and patient survival. Moreover, the association between stromal fibroblasts and patient survival depends upon platinum response. Thus, we provide mechanistic and clinical insight into platinum-based resistance.

Intraepithelial (Peng et al., 2015; Sato et al., 2005; Zhao et al., 2016) and stromal CD8<sup>+</sup> T cells correlate with improved survival in ovarian cancer. Tumor stromal CD8<sup>+</sup> T cells may not directly participate in tumor cell killing activities. We have found that stromal CD8<sup>+</sup> T cells modulate stroma function and in turn regulate tumor progression and therapeutic response. For example, CD8<sup>+</sup> T cells can abolish fibroblast-mediated platinum resistance via IFN $\gamma$ . CD8<sup>+</sup> T cells alter the metabolism of cystine and GSH in fibroblasts. CD8<sup>+</sup> T cell-derived IFN $\gamma$  activates GGT and promotes extracellular GSH degradation and diminishes fibroblast cysteine generation through downregulation of system xc<sup>-</sup> cysteine and glutamate antiporter. Furthermore, IFN $\gamma$ -activated STAT1 binds to specific promoter region of xCT and rapidly inhibits xCT gene transcription through JAK-STAT1 signaling in fibroblasts but not in tumor cells. Hence, our work identifies an unexpected mode of action for effector T cells and IFN $\gamma$  in the tumor: CD8<sup>+</sup> T cells and IFN $\gamma$  selectively target stromal fibroblasts, shape their thiol metabolism, and impact tumor chemotherapeutic response. Therefore, effective immunotherapy may subvert chemoresistance and revitalize tumor sensitivity to chemotherapy. Platinum-based drugs remain the first line of chemotherapy for ovarian cancer patients. Clinical responses to PD-L1 and PD-1 blockade are observed in a fraction of patients (Zou et al., 2016). Capitalizing upon the interplay between chemotherapy and immunotherapy holds promising clinical potential for ovarian cancer treatment.

## EXPERIMENTAL PROCEDURES

### Ovarian Cancer Patients, Cancer Tissue Samples, and Cells

Patients diagnosed with HGSOV were recruited for this study. All patients received standardized platinum-based chemotherapy that was administered every 3 weeks for six cycles. Platinum resistance was defined as a progression within 6 months of the platinum therapy. A total of 178 formalin-fixed, paraffin-embedded ovarian tumor tissue blocks and nine fresh ovarian cancer tissues were collected for this study (Curjel et al., 2003, 2004; Peng et al., 2015). A tissue microarray (TMA) was constructed, and immunohistochemical staining was performed as previously described (Cui et al., 2013; Peng et al., 2015). Single cell suspension was prepared from fresh ovarian cancer tissues and fibroblasts were isolated from the adherent cells. CD8<sup>+</sup> T cells were isolated from peripheral blood mononuclear cells using the EasySep Human CD8<sup>+</sup> T Cell Isolation Kit (Stemcell) and then stimulated with immobilized anti-CD3 and anti-CD28.

### Tumor and Fibroblast Co-culture

For mixed co-culture, fibroblasts and A2780-GFP cells were co-cultured and Annexin V<sup>+</sup> cells were analyzed with GFP gating. For Transwell co-culture, fibroblasts were seeded in the plates and tumor cells were in the inserts.

### Animal Studies

Female nude mice or NSG mice (6- to 8-week-old) were used for in vivo experiments. Cisplatin or recombinant human IFN $\gamma$  was administered intraperitoneally every 3 days for total three treatments or as indicated.

### Detection of GSH-Related Metabolites

Fresh medium was analyzed with LC-triple quadrupole mass spectrometer (Agilent 6490 series) with jet stream electrospray ionization source (Agilent). Chromatography was carried out on a Waters C18 High Strength Silica T3 column (50 mm  $\times$  2 mm) on Agilent 1200 Series liquid chromatography.

### ChIP

ChIP assay was described previously (Peng et al., 2015) (Table S7).

### Detection of Cisplatin

Cell pellets or total DNA were digested and platinum concentration was measured using ICP-HRMS Element 2 (Thermo Scientific).

### Radiolabeled Cystine Uptake Assay

Cells were cultured in different conditions in medium containing L-<sup>14</sup>C-cystine (0.2  $\mu$ Ci/ml) and lysed in NaOH (100 mM). Radioactivity was measured by a Beckman liquid scintillation counter.

### Statistical Analysis

Data were shown as mean  $\pm$  SEM or mean  $\pm$  SD. Statistical analysis was performed using two sample t test, Mann-Whitney test, or one-way or two-way ANOVA. For all tests,  $p < 0.05$  was considered significant.

## SUPPLEMENTAL INFORMATION

Supplemental Information includes Supplemental Experimental Procedures, seven figures, and seven tables and can be found with this article online at <http://dx.doi.org/10.1016/j.cell.2016.04.009>.

## AUTHOR CONTRIBUTIONS

W.W., I.K., J.R.L., and W.Z. designed the experiments and wrote the paper. S.W., W.W., L.T., and G.H. performed the xenograft tumor experiments. W.W., I.K., and L.T. processed clinical specimens. W.W. and F.L. performed the DNA damage experiments. W.W., I.K., D.P., and J.R.L. performed immunohistochemical and pathological analysis. L.D. performed platinum quantification on ICP-MS. H.L. performed ChIP experiments. J.K., R.T., and J.R.L. provided clinical samples and information. R.K., W.W., I.K., L.Z., T.M., and W.Z. analyzed data. L.V. and W.S. provided technical support.

## ACKNOWLEDGMENTS

This work is supported (in part) by the Department of Defense (W81XWH-10-1-0865), the NIH grants (CA123088, CA099985, CA156685, CA171306, CA190176, CA193136, and 5P30CA46592), the Ovarian Cancer Research Fund, and Marsha Rivkin Center for Ovarian Cancer Research. This work utilized Metabolomics Core Services supported by grant U24 DK097153 of NIH Common Funds Project to the University of Michigan. We thank Kathleen Cho for her intellectual support. We thank D. Postiff, M. Vinco, R. Craig, and J. Barikdar for their assistance. We thank Chunhai Ruan and Charles F. Burant at the Metabolomics Core, Ted J. Huston at the Department of Earth and Environmental Sciences, Peng Huang at the University of Texas, and Stephen B. Howell at the University of California San Diego for their support. We appreciate the support from Barbara and Don Leclair.

Received: April 29, 2015

Revised: January 28, 2016

Accepted: April 1, 2016

Published: April 28, 2016

## REFERENCES

Binder, D.C., Fu, Y.X., and Weichselbaum, R.R. (2015). Radiotherapy and immune checkpoint blockade: potential interactions and future directions. *Trends Mol. Med.* 21, 463–465.

- Chen, H.H., and Kuo, M.T. (2010). Role of glutathione in the regulation of Cisplatin resistance in cancer chemotherapy. *Met. Based Drugs* 2010, 430939.
- Cui, T.X., Kryczek, I., Zhao, L., Zhao, E., Kuick, R., Roh, M.H., Vatan, L., Szeliga, W., Mao, Y., Thomas, D.G., et al. (2013). Myeloid-derived suppressor cells enhance stemness of cancer cells by inducing microRNA101 and suppressing the corepressor CtBP2. *Immunity* 39, 611–621.
- Curiel, T.J., Wei, S., Dong, H., Alvarez, X., Cheng, P., Mottram, P., Krzysiek, R., Knutson, K.L., Daniel, B., Zimmermann, M.C., et al. (2003). Blockade of B7-H1 improves myeloid dendritic cell-mediated antitumor immunity. *Nat. Med.* 9, 562–567.
- Curiel, T.J., Coukos, G., Zou, L., Alvarez, X., Cheng, P., Mottram, P., Evdemon-Hogan, M., Conejo-Garcia, J.R., Zhang, L., Burow, M., et al. (2004). Specific recruitment of regulatory T cells in ovarian carcinoma fosters immune privilege and predicts reduced survival. *Nat. Med.* 10, 942–949.
- Dabrowiak, J.C., Goodisman, J., and Souid, A.K. (2002). Kinetic study of the reaction of cisplatin with thiols. *Drug Metab. Dispos.* 30, 1378–1384.
- Domcke, S., Sinha, R., Levine, D.A., Sander, C., and Schultz, N. (2013). Evaluating cell lines as tumour models by comparison of genomic profiles. *Nat. Commun.* 4, 2126.
- Galluzzi, L., Senovilla, L., Vitale, I., Michels, J., Martins, I., Kepp, O., Castedo, M., and Kroemer, G. (2012). Molecular mechanisms of cisplatin resistance. *Oncogene* 31, 1869–1883.
- Ishikawa, T., and Ali-Osman, F. (1993). Glutathione-associated cis-diamminedichloroplatinum(II) metabolism and ATP-dependent efflux from leukemia cells. Molecular characterization of glutathione-platinum complex and its biological significance. *J. Biol. Chem.* 268, 20116–20125.
- Ishimoto, T., Nagano, O., Yae, T., Tamada, M., Motohara, T., Oshima, H., Oshima, M., Ikeda, T., Asaba, R., Yagi, H., et al. (2011). CD44 variant regulates redox status in cancer cells by stabilizing the xCT subunit of system xc(-) and thereby promotes tumor growth. *Cancer Cell* 19, 387–400.
- Kalluri, R., and Zeisberg, M. (2006). Fibroblasts in cancer. *Nat. Rev. Cancer* 6, 392–401.
- Kraman, M., Bambrough, P.J., Arnold, J.N., Roberts, E.W., Magiera, L., Jones, J.O., Gopinathan, A., Tuveson, D.A., and Fearon, D.T. (2010). Suppression of antitumor immunity by stromal cells expressing fibroblast activation protein- $\alpha$ . *Science* 330, 827–830.
- Krönig, R., Lichtenstein, A.K., and Nagami, G.T. (2000). Sulfur-containing amino acids decrease cisplatin cytotoxicity and uptake in renal tubule epithelial cell lines. *Cancer Chemother. Pharmacol.* 45, 43–49.
- Lee, Y., Auh, S.L., Wang, Y., Burnette, B., Wang, Y., Meng, Y., Beckett, M., Sharma, R., Chin, R., Tu, T., et al. (2009). Therapeutic effects of ablative radiation on local tumor require CD8+ T cells: changing strategies for cancer treatment. *Blood* 114, 589–595.
- Loeffler, M., Krüger, J.A., Niethammer, A.G., and Reisfeld, R.A. (2006). Targeting tumor-associated fibroblasts improves cancer chemotherapy by increasing intratumoral drug uptake. *J. Clin. Invest.* 116, 1955–1962.
- Lushchak, V.I. (2012). Glutathione homeostasis and functions: potential targets for medical interventions. *J. Amino Acids* 2012, 736837.
- Mårtensson, J., and Meister, A. (1989). Mitochondrial damage in muscle occurs after marked depletion of glutathione and is prevented by giving glutathione monoester. *Proc. Natl. Acad. Sci. USA* 86, 471–475.
- Özdemir, B.C., Pentcheva-Hoang, T., Carstens, J.L., Zheng, X., Wu, C.C., Simpson, T.R., Laklai, H., Sugimoto, H., Kahlert, C., Novitskiy, S.V., et al. (2014). Depletion of carcinoma-associated fibroblasts and fibrosis induces immunosuppression and accelerates pancreas cancer with reduced survival. *Cancer Cell* 25, 719–734.
- Peng, D., Kryczek, I., Nagarsheth, N., Zhao, L., Wei, S., Wang, W., Sun, Y., Zhao, E., Vatan, L., Szeliga, W., et al. (2015). Epigenetic silencing of TH1-type chemokines shapes tumour immunity and immunotherapy. *Nature* 527, 249–253.
- Revet, I., Feeney, L., Bruguera, S., Wilson, W., Dong, T.K., Oh, D.H., Dankort, D., and Cleaver, J.E. (2011). Functional relevance of the histone gammaH2Ax in the response to DNA damaging agents. *Proc. Natl. Acad. Sci. USA* 108, 8663–8667.
- Sato, E., Olson, S.H., Ahn, J., Bundy, B., Nishikawa, H., Qian, F., Jungbluth, A.A., Frosina, D., Gnjatic, S., Ambrosone, C., et al. (2005). Intraepithelial CD8+ tumor-infiltrating lymphocytes and a high CD8+/regulatory T cell ratio are associated with favorable prognosis in ovarian cancer. *Proc. Natl. Acad. Sci. USA* 102, 18538–18543.
- Soussi, T., Hamroun, D., Hjortsberg, L., Rubio-Nevado, J.M., Fournier, J.L., and Bérout, C. (2010). MUT-TP53 2.0: a novel versatile matrix for statistical analysis of TP53 mutations in human cancer. *Hum. Mutat.* 31, 1020–1025.
- Straussman, R., Morikawa, T., Shee, K., Barzily-Rokni, M., Qian, Z.R., Du, J., Davis, A., Mongare, M.M., Gould, J., Frederick, D.T., et al. (2012). Tumour micro-environment elicits innate resistance to RAF inhibitors through HGF secretion. *Nature* 487, 500–504.
- Topalian, S.L., Drake, C.G., and Pardoll, D.M. (2015). Immune checkpoint blockade: a common denominator approach to cancer therapy. *Cancer Cell* 27, 450–461.
- Wang, D., and Lippard, S.J. (2005). Cellular processing of platinum anticancer drugs. *Nat. Rev. Drug Discov.* 4, 307–320.
- Yeung, T.L., Leung, C.S., Wong, K.K., Samimi, G., Thompson, M.S., Liu, J., Zaid, T.M., Ghosh, S., Birrer, M.J., and Mok, S.C. (2013). TGF- $\beta$  modulates ovarian cancer invasion by upregulating CAF-derived versican in the tumor microenvironment. *Cancer Res.* 73, 5016–5028.
- Zhang, L., Conejo-Garcia, J.R., Katsaros, D., Gimotty, P.A., Massobrio, M., Regnani, G., Makrigiannakis, A., Gray, H., Schlienger, K., Liebman, M.N., et al. (2003). Intratumoral T cells, recurrence, and survival in epithelial ovarian cancer. *N. Engl. J. Med.* 348, 203–213.
- Zhang, W., Trachootham, D., Liu, J., Chen, G., Pelicano, H., Garcia-Prieto, C., Lu, W., Burger, J.A., Croce, C.M., Plunkett, W., et al. (2012). Stromal control of cystine metabolism promotes cancer cell survival in chronic lymphocytic leukaemia. *Nat. Cell Biol.* 14, 276–286.
- Zhao, E., Maj, T., Kryczek, I., Li, W., Wu, K., Zhao, L., Wei, S., Crespo, J., Wan, S., Vatan, L., et al. (2016). Cancer mediates effector T cell dysfunction by targeting microRNAs and EZH2 via glycolysis restriction. *Nat. Immunol.* 17, 95–103.
- Zitvogel, L., Kepp, O., and Kroemer, G. (2010). Decoding cell death signals in inflammation and immunity. *Cell* 140, 798–804.
- Zou, W. (2005). Immunosuppressive networks in the tumour environment and their therapeutic relevance. *Nat. Rev. Cancer* 5, 263–274.
- Zou, W., Wolchok, J.D., and Chen, L. (2016). PD-L1 (B7-H1) and PD-1 pathway blockade for cancer therapy: Mechanisms, response biomarkers, and combinations. *Sci. Transl. Med.* 8, 328rv4.



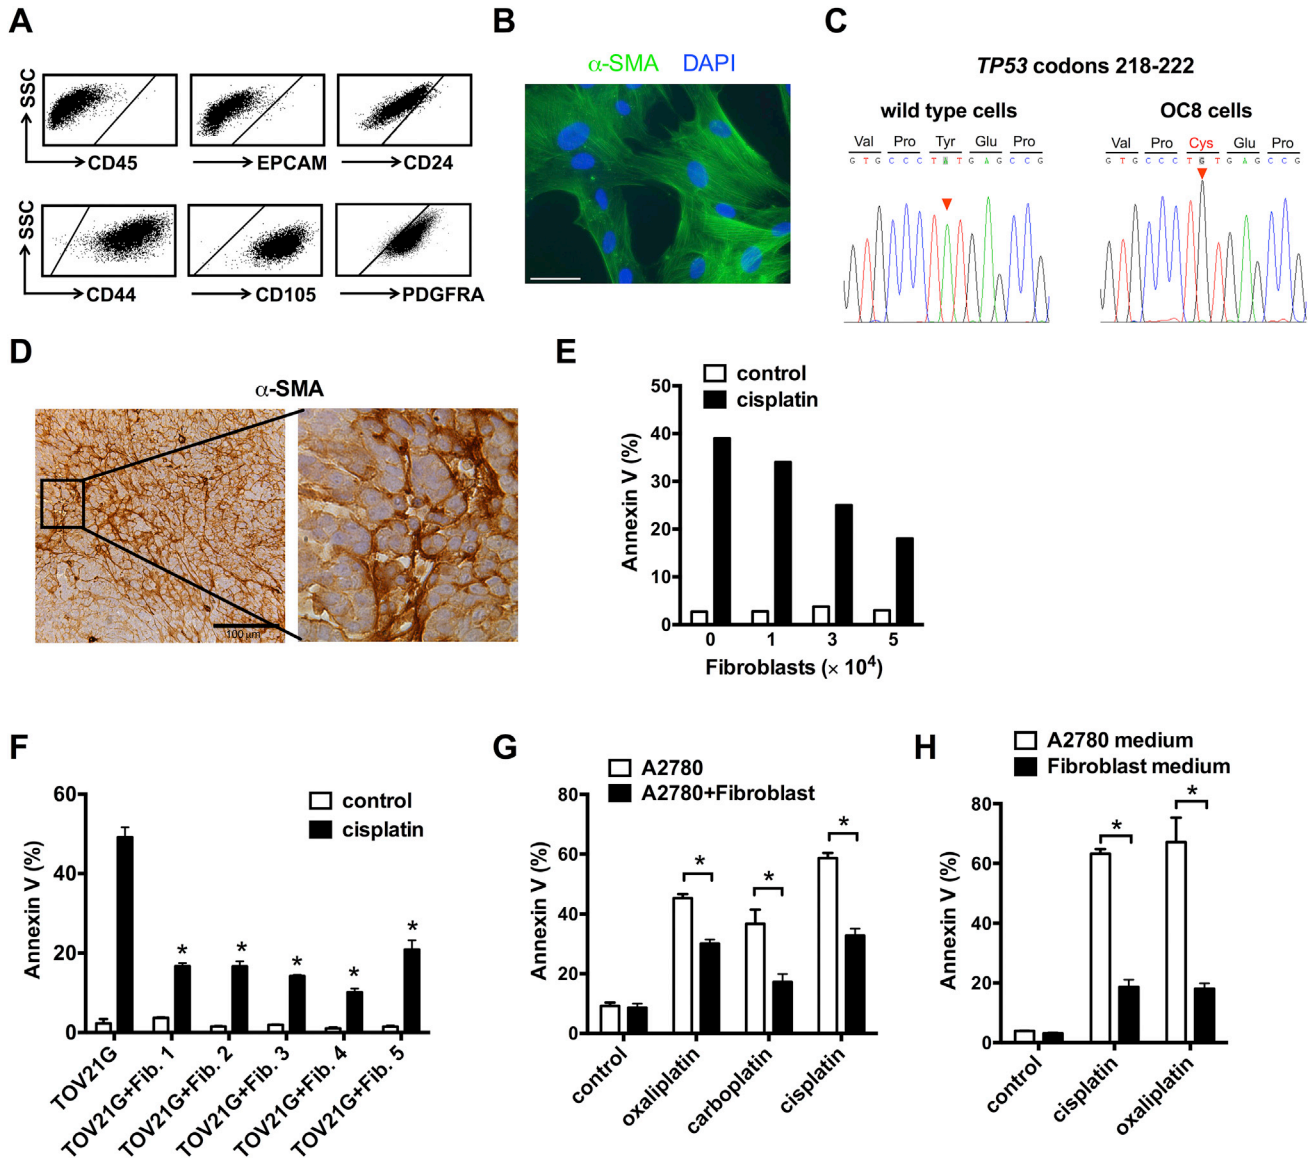

**Figure S1. Effect of Fibroblasts on Platinum-Based Drug-Induced Tumor Cell Apoptosis, Related to Figure 1**

(A and B) Phenotype of isolated primary ovarian cancer associated fibroblasts. (A) Fibroblasts were identified by flow cytometry as CD45<sup>-</sup>EPCAM<sup>-</sup>CD24<sup>-</sup>CD44<sup>+</sup>CD105<sup>+</sup>PDGFRA<sup>+</sup>. One representative FACS shows the fibroblast phenotype from 8 patients. (B) Isolated primary fibroblasts were stained with anti- $\alpha$ -SMA. One representative image shows  $\alpha$ -SMA<sup>+</sup> fibroblast from 9 patients. Scale bar, 30  $\mu$ m.

(C) Tyr220Cys mutation was identified in OC8 cells. Genomic DNA from TP53 wild-type cells or OC8 cells was prepared and all exons of p53 were amplified and subjected to DNA sequencing analysis. Sequences between codons 218 and 222 of p53 exon 6 were shown. Compared with wild-type cells, A is replaced by G at position 659 (codon 220) of p53 in OC8 cells, that resulted in a tyrosine-to-cysteine amino acid substitution (Tyr220Cys).

(D) Immunohistochemistry (IHC) staining demonstrates  $\alpha$ -SMA positive cells in tumor sections in mice inoculated with both A2780 and fibroblasts. Scale bar, 100  $\mu$ m.

(E) Effects of fibroblasts on tumor cell apoptosis induced by cisplatin. A2780 cells were cultured with different concentrations of fibroblasts, and treated with cisplatin. A2780 cell apoptosis was determined by Annexin V staining.

(F) Effect of fibroblasts on cisplatin-induced apoptosis of TOV21G in the Transwell co-culture. TOV21G cells were co-cultured with fibroblasts from different ovarian cancer patients in the Transwell for 3 days, and then treated with cisplatin. Cancer cell apoptosis was analyzed by Annexin V staining. Values are shown as mean  $\pm$  SD, n = 3, \*p < 0.05.

(G) Effect of fibroblast on apoptosis induced by platinum-based drugs. A2780 cells were cultured with fibroblasts in the Transwell and then treated with 4  $\mu$ g/ml cisplatin, 10  $\mu$ g/ml oxaliplatin or 50  $\mu$ g/ml carboplatin for 40 hr. A2780 cell apoptosis was determined by Annexin V staining. Mean  $\pm$  SD, n = 3, \*p < 0.05.

(H) Effect of fibroblast medium on oxaliplatin-induced tumor apoptosis. A2780 cells were cultured in cancer cell medium or in fibroblast medium with cisplatin or oxaliplatin for 40 hr. A2780 cell apoptosis was determined by Annexin V staining. Mean  $\pm$  SD, n = 3, \*p < 0.05.

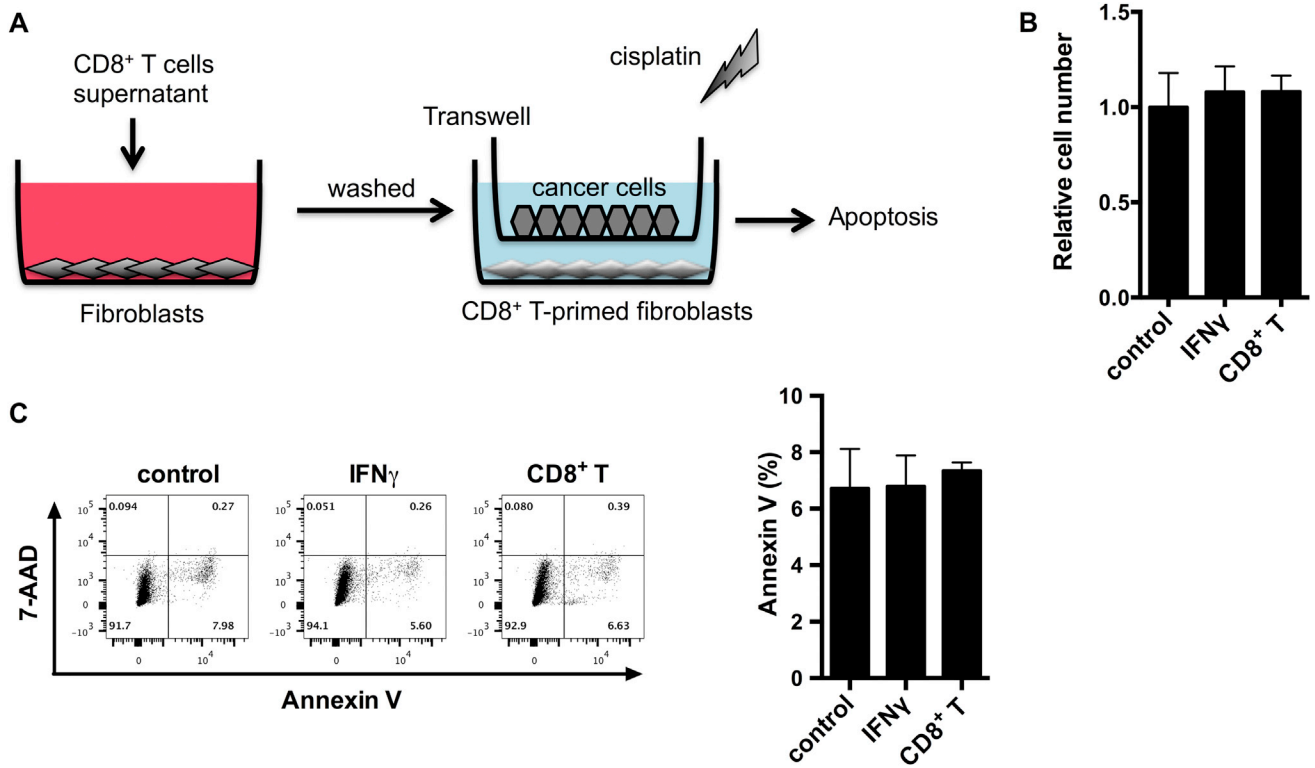

**Figure S2. Effect of IFN $\gamma$  on Fibroblast Cell Numbers and Viability, Related to Figure 2**

(A) Schematic experimental approach showing the interaction among CD8<sup>+</sup> T cells, fibroblasts and tumor cells in the co-culture system. Fibroblasts were primed with CD8<sup>+</sup> T cell supernatants, washed, and subsequently co-cultured with tumor cells in the Transwell. Chemotherapeutic drugs were added into the co-culture. Tumor cells were used to determine cell apoptosis, drug content and thiol metabolites.

(B and C) Effects of IFN $\gamma$  or CD8<sup>+</sup> T cells on fibroblast numbers and apoptosis. Fibroblasts were primed with IFN $\gamma$  5 ng/mL or CD8<sup>+</sup> T cell supernatant. Cell numbers were counted (B) and apoptosis was analyzed by Annexin V staining after 4 days (C). Representative flow cytometry dot plots are shown (left). Results are shown as the mean  $\pm$  SD, n = 3, p > 0.05.

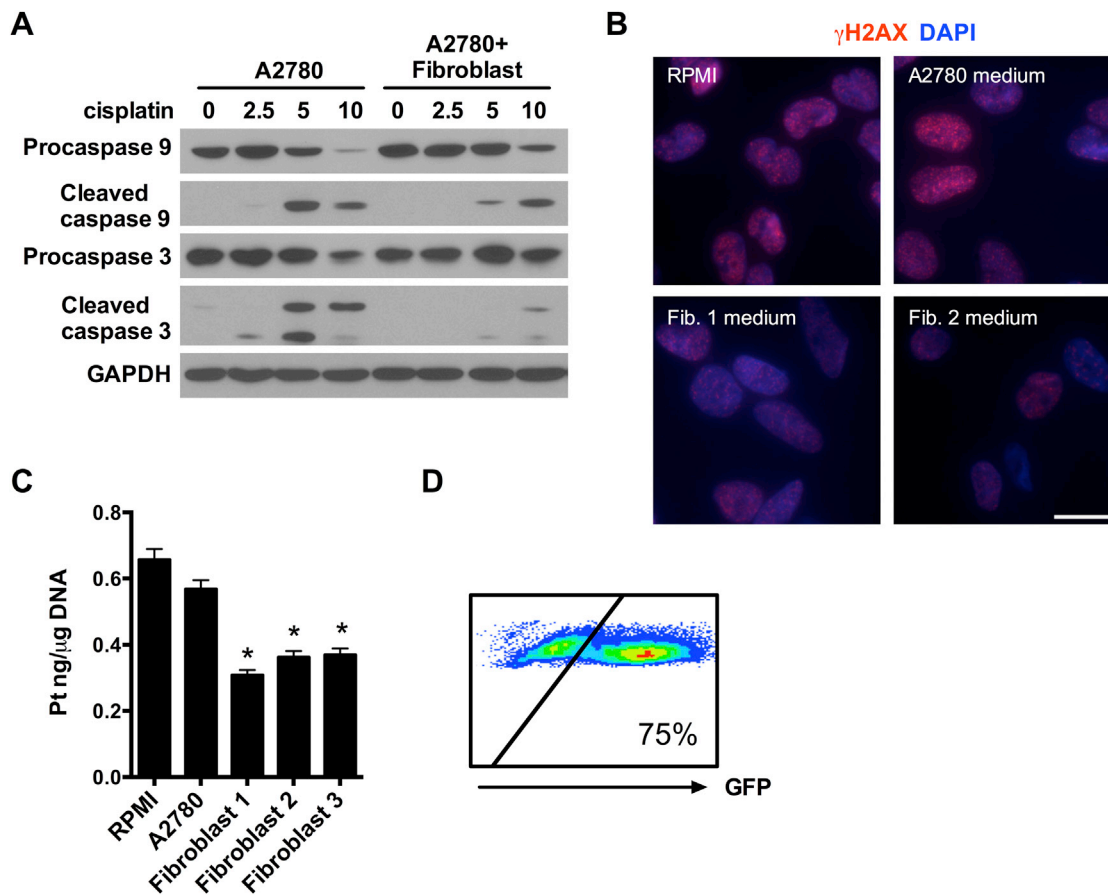

**Figure S3. Effect of Fibroblasts on Cisplatin-Induced Apoptosis Gene Expression in Tumor Cells, Related to Figure 3**

(A) Effect of fibroblasts on cisplatin-induced caspase 3 and caspase 9 expression in tumor cells. A2780 cells were cultured with fibroblast in the Tranwells for 3 days and treated with cisplatin. Pro- and cleaved- caspase 9 and caspase 3 proteins were detected in A2780 cells by western blotting. One of 3 experiments by using fibroblasts from 3 different patients is shown.

(B) Effect of fibroblast medium on cisplatin-induced  $\gamma$ H2AX in A2780 cells. A2780 cells were incubated with fibroblast medium from two different patients in the presence of cisplatin.  $\gamma$ H2AX was detected in tumor cells by immunofluorescence staining. Representative images are shown. Scale bar, 10  $\mu$ m.

(C) Effect of fibroblast medium on cisplatin content in A2780 cells. A2780 cells were cultured with fibroblast medium in the presence of 10  $\mu$ g/ml of cisplatin. Platinum content in the genomic DNA was measured by ICP-MS in triplicate. Mean  $\pm$  SD, \* $p$  < 0.05 compared with A2780 group.

(D) GFP<sup>+</sup> tumor cells enriched from OC8 xenografts. Tumor cells were enriched by depletion of CD44<sup>+</sup> fibroblasts and CD45<sup>+</sup> lymphocytes using PE-conjugated CD44 and CD45 antibodies. GFP<sup>+</sup> tumor cells are shown by flow cytometry.

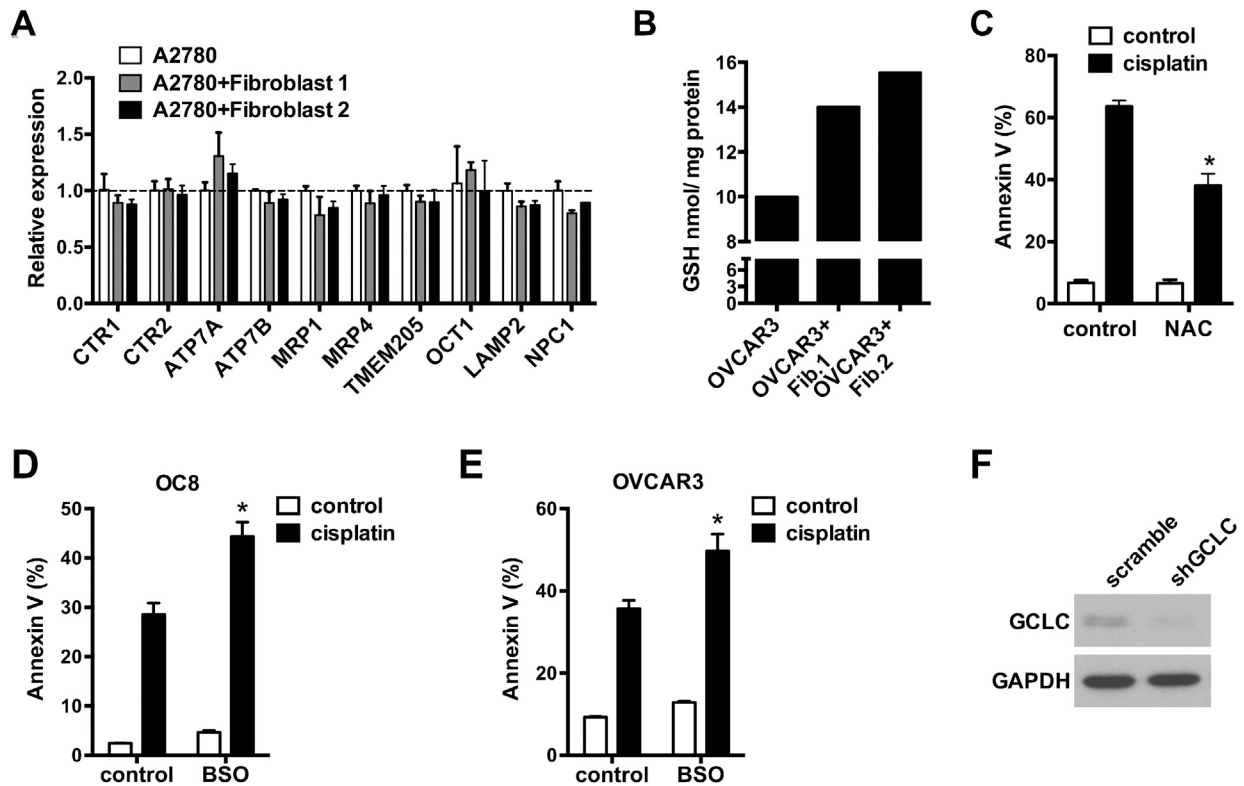

**Figure S4. Effect of Fibroblasts on the Cisplatin Transporter Expression in Cancer Cells, Related to Figure 4**

(A) Effect of fibroblasts on cisplatin transporter gene expressions in tumor cells. A2780 cells were cultured with fibroblast from two different patients in the Transwells for 3 days. The mRNA expression of membrane transporter genes related with cisplatin influx or efflux was analyzed by real-time PCR. Data are presented as fold change in gene expression relative to A2780 cultured alone, mean  $\pm$  SD,  $n = 3$ ,  $p > 0.05$  for cisplatin efflux transporters or cisplatin influx transporters.

(B) Effect of fibroblasts on intracellular GSH levels in NIH:OVCAR3 cells. OVCAR3 cells were cultured with fibroblasts from two different patients in the Transwell for 3 days. GSH level in tumor cells was measured.

(C) Effect of NAC on cisplatin-induced apoptosis in A2780 cells. A2780 cells were pretreated with NAC 200  $\mu$ M for 6 hr and followed with cisplatin treatment. A2780 cell apoptosis was determined by Annexin V staining. Mean  $\pm$  SD,  $n = 3$ ,  $*p < 0.05$ .

(D and E) Effect of BSO on cisplatin-induced apoptosis in OC8 (D) or NIH:OVCAR3 (E) cells. Tumor cells were pretreated with 6  $\mu$ M BSO for 6 hr and followed with cisplatin treatment. Cisplatin-induced apoptosis was determined by Annexin V staining. Mean  $\pm$  SD,  $n = 3$ ,  $*p < 0.05$ .

(F) Efficacy of GCLC knockdown by shGCLC in A2780 cells. A2780 cells were transfected with lentiviral vectors expressing scrambled shRNA or shGCLC. GCLC protein expression was determined by western blotting.

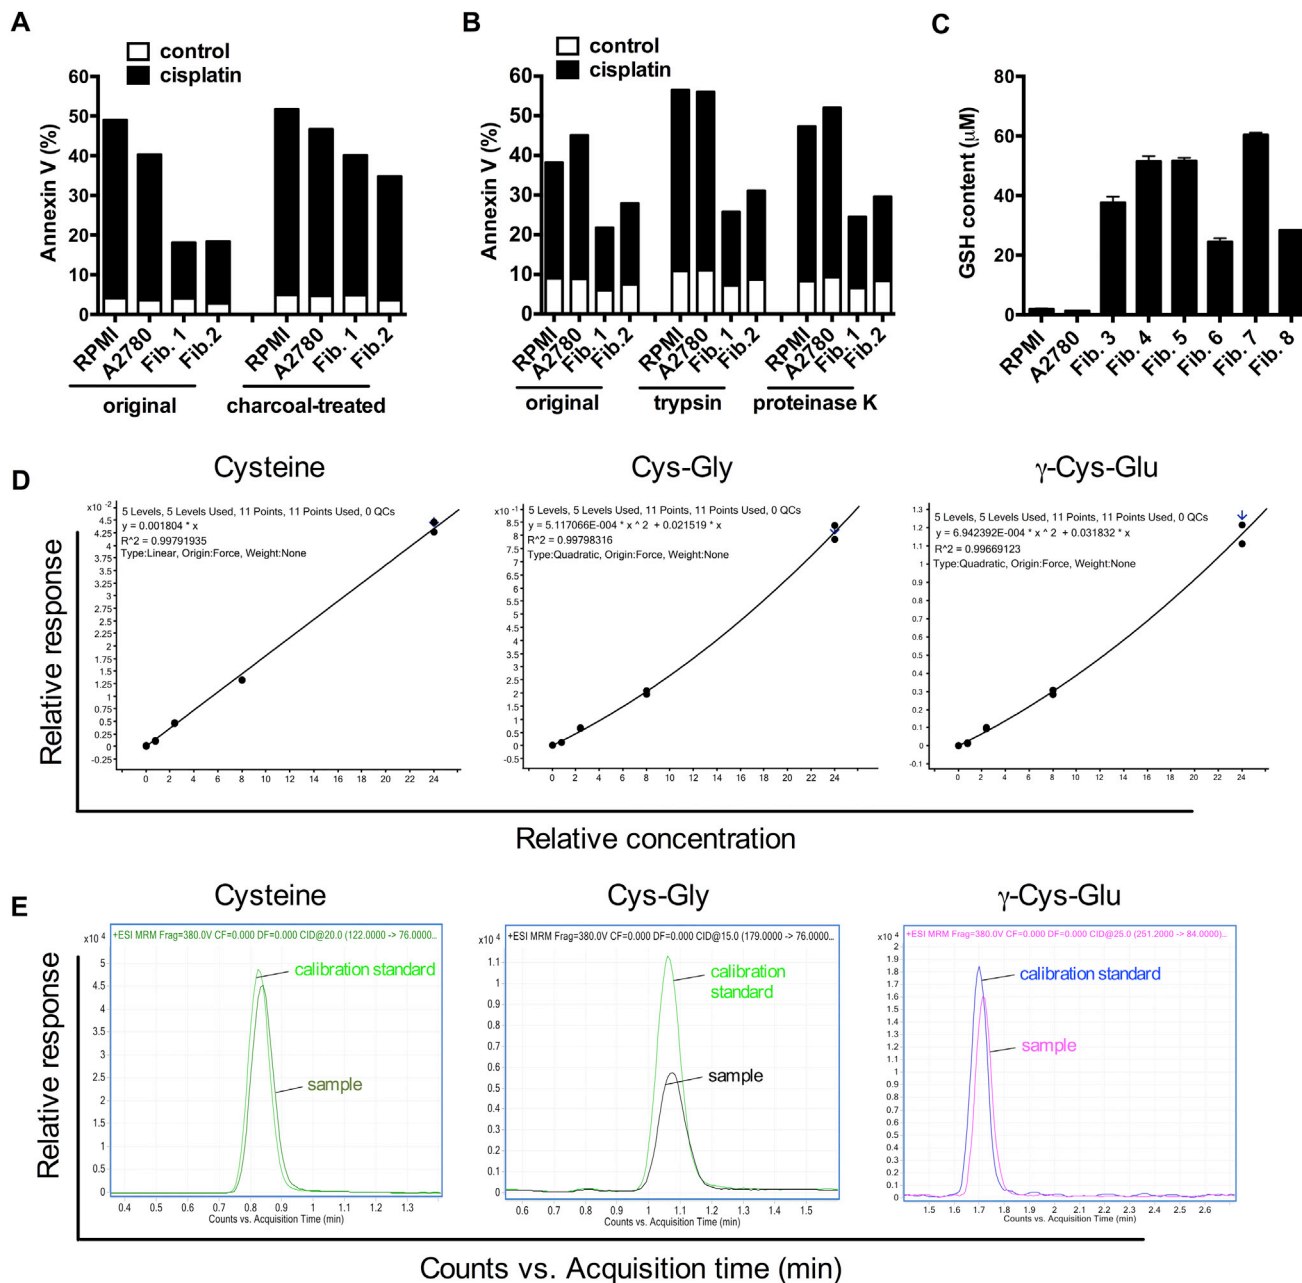

**Figure S5. Roles of Fibroblast-Derived Factors in Cisplatin-Induced Tumor Apoptosis, Related to Figure 5**

(A) Effect of charcoal on protective function of fibroblast medium. A2780 cells were incubated in fresh medium, cancer cell medium, or fibroblast medium that were pre-incubated with or without dextran-coated charcoal. Cisplatin-induced tumor cell apoptosis was determined by Annexin V staining. One of 2 experiments is shown.

(B) Effect of Trypsin or Proteinase K on the protective function of fibroblast medium. Cancer cell medium and fibroblast medium were incubated with Trypsin (100 µg/ml) or Proteinase K (100 µg/ml) for 2 hr, and filtered using a 3kDa cutoff. The fraction of < 3kDa was collected. The effect of this fraction on cisplatin-induced tumor apoptosis was determined by Annexin V staining. One of 3 experiments is shown.

(C) GSH contents in fresh RPMI, cancer cell medium and fibroblast medium from six patient specimens. Each sample was measured in triplicate (mean ± SD).

(D) The standard curves of cysteine, Cys-Gly and γ-Cys-Glu. GSH-related three metabolites in medium samples were quantified using a triple-quadrupole mass spectrometer. The standard curves show the linearity of the assay.

(E) Extracted ion chromatograms of cysteine, Cys-Gly and γ-Cys-Glu from calibration standard and medium samples were shown. Peaks correspond to the specific transition of each metabolite.

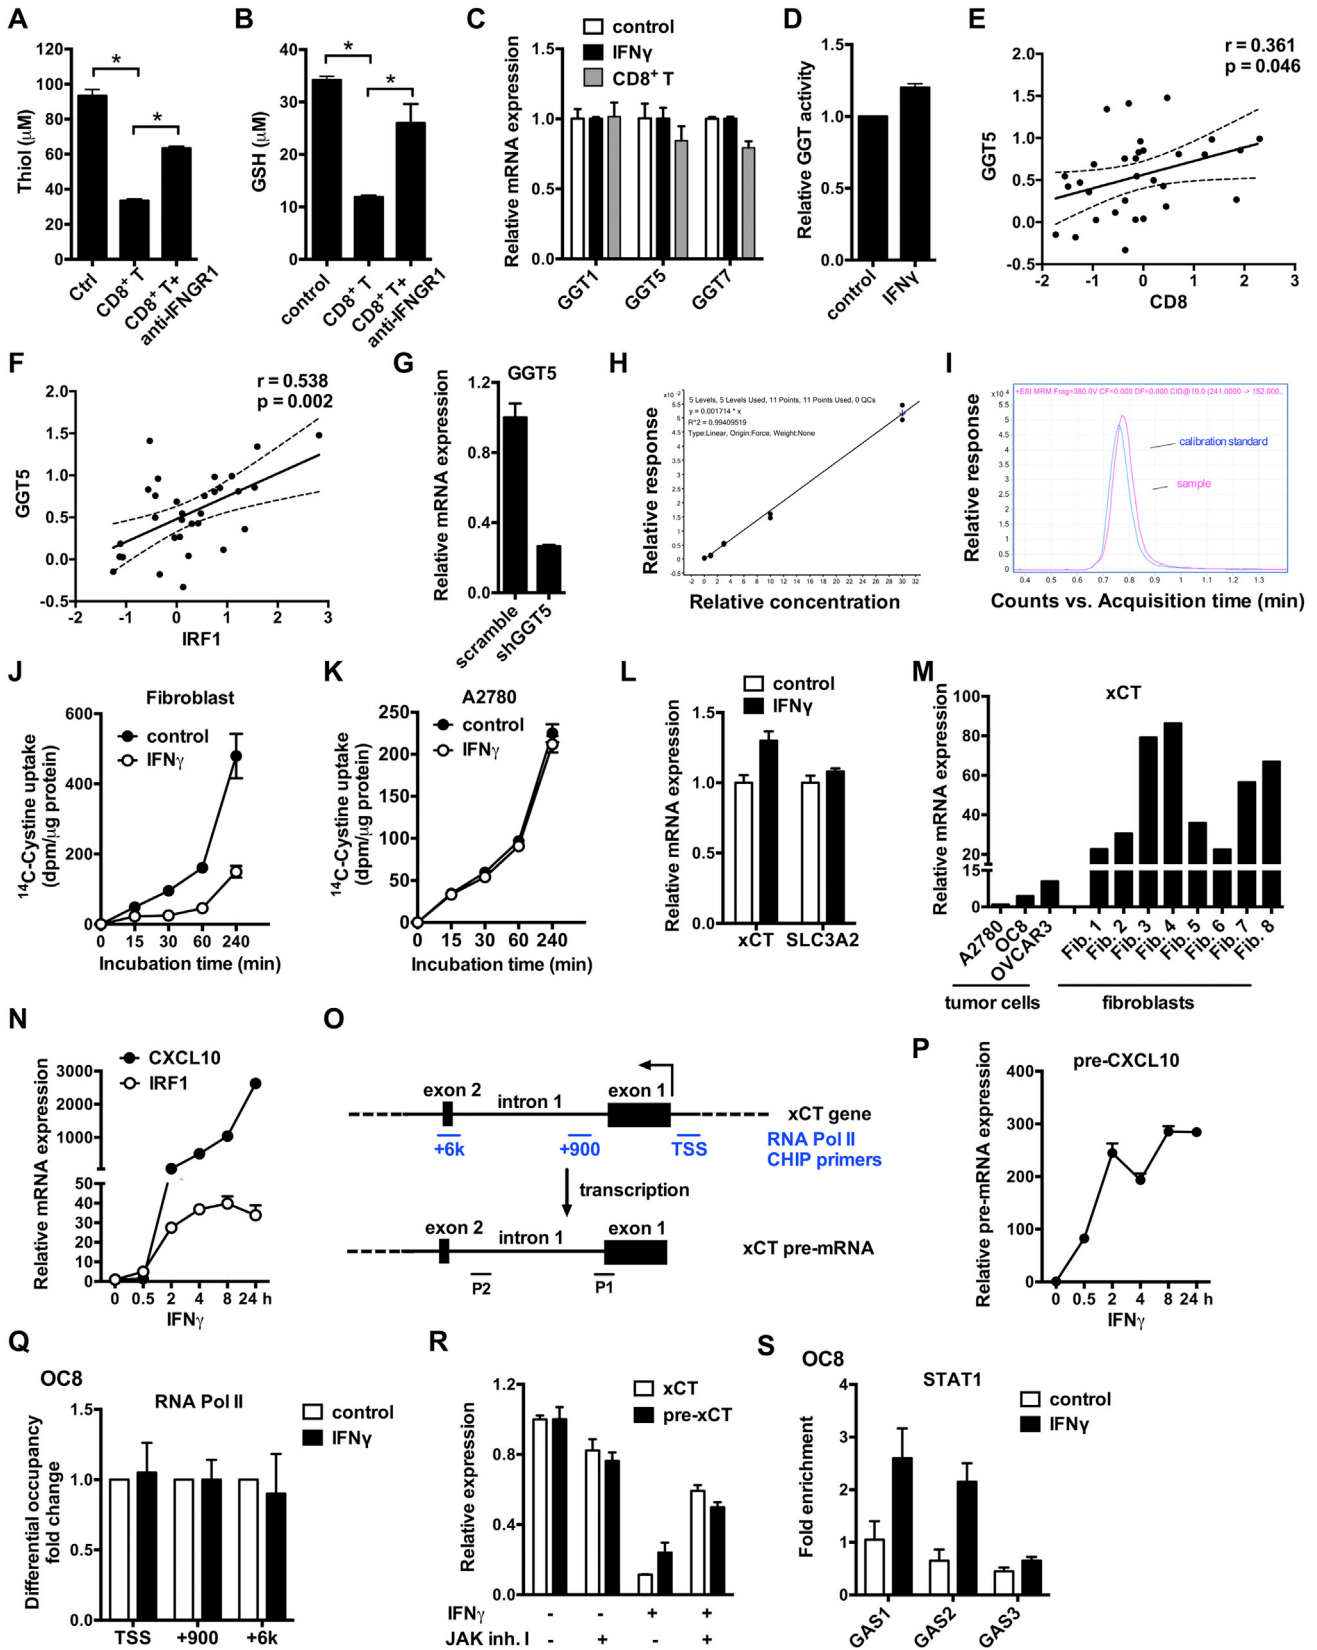

(legend on next page)



---

**Figure S6. Effects of IFN $\gamma$  on GGT Gene Expression and Cystine Uptake in Cancer Cells, Related to Figure 6**

(A and B) Total Thiol (A) and GSH (B) concentrations in medium samples. Fibroblasts were primed with CD8<sup>+</sup> T cell supernatants in the presence of neutralization antibody against IFN $\gamma$  R1. Values are shown as mean  $\pm$  SD; n = 3, \*p < 0.05.

(C) Real-time PCR assays of GGT mRNAs in A2780 cells treated with IFN $\gamma$  or CD8<sup>+</sup> T cell supernatants for 24 hr. Data are presented as fold change in gene expression relative to control group (mean  $\pm$  SD, n = 3).

(D) GGT enzymatic activity in A2780 cells after 48h of IFN $\gamma$  treatment. Values are shown as mean  $\pm$  SD, n = 3.

(E and F) Correlation of *CD8* and *GGT5* (E) or *IRF1* and *GGT5* (F) in ovarian cancer stroma. The correlation was analyzed in a dataset (GEO: GSE40595) containing transcriptome of ovarian cancer stroma.

(G) The knockdown efficiency of shGGT5 in fibroblasts was determined by RT-PCR, mean  $\pm$  SD, n = 3.

(H and I) The standard curve of cystine (H) and extracted ion chromatograms of cystine from calibration standard and medium samples (I) in the LC-MS/MS assay are shown.

(J and K) Effect of IFN $\gamma$  on <sup>14</sup>C-Cystine uptake by fibroblasts (J) or cancer cells (K). Fibroblasts or cancer cells were primed with 5 ng/mL IFN $\gamma$  and incubated in medium containing <sup>14</sup>C-Cystine for 0 - 240 min. <sup>14</sup>C radioactivity was measured in triplicates and results are shown as the mean  $\pm$  SD.

(L) xCT and SLC3A2 mRNA expressions in A2780 cells treated with IFN $\gamma$  were analyzed by real-time PCR (mean  $\pm$  SD, n = 3).

(M) Relative xCT mRNA expression in tumor cells and fibroblasts from different ovarian cancer patient specimens was analyzed by RT-PCR.

(N) Real-time PCR assays of *IRF1* and *CXCL9* mRNA expressions in fibroblasts treated with IFN $\gamma$  5 ng/ml for different time points. Data are presented as fold change relative to control (mean  $\pm$  SD).

(O) Graphical map showing the relative position of primers used to quantify xCT pre-mRNA and immunoprecipitated chromatin by RNA Polymerase II antibody.

(P) Real-time PCR assays of *CXCL10* pre-mRNA in fibroblasts treated with IFN $\gamma$  for different time points. Data are presented as fold change relative to control (mean  $\pm$  SD of duplicate).

(Q) ChIP of RNA Pol II in OC8 cells treated with or without IFN $\gamma$  for 30 min. RNA Pol II binding to xCT promoter TSS and intragenic regions (+900 and +6k) was quantified by ChIP-qPCR. Results are expressed as the fold changes in site occupancy over control (mean  $\pm$  SD of duplicate).

(R) Effect of JAK inhibitor on IFN $\gamma$ -mediated xCT downregulation. Fibroblasts were pretreated with JAK inhibitor I (5  $\mu$ M) for 30 min and followed with IFN $\gamma$  treatment for 24 hr. The xCT mRNA and pre-mRNA levels were detected by real-time PCR. Results are shown as mean  $\pm$  SD, n = 3.

(S) ChIP of STAT1 on OC8 cells. ChIP of STAT1 was performed in OC8 cells with or without IFN $\gamma$  treatment. Data were normalized to IgG in duplicates.

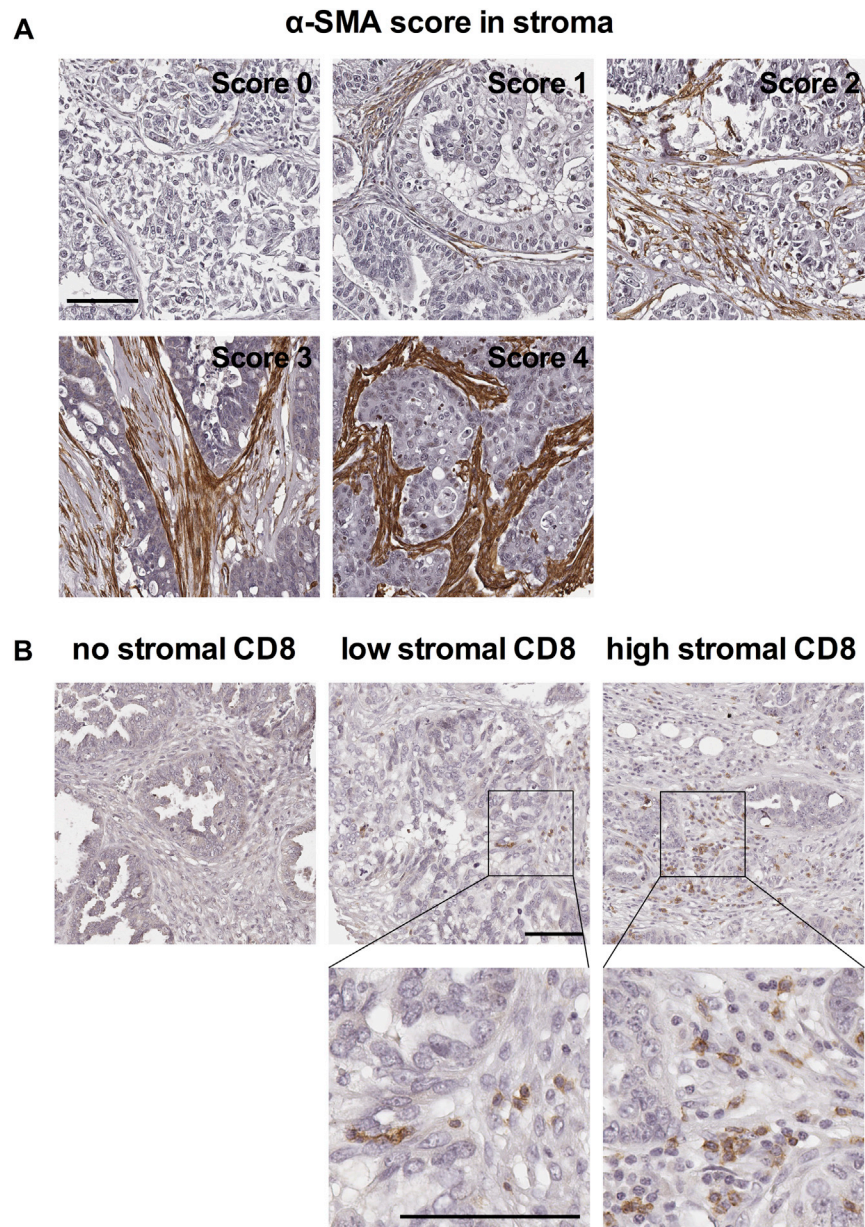

**Figure S7. Fibroblasts and CD8<sup>+</sup> T Cells Are Identified and Analyzed in Ovarian Cancer Stroma, Related to Figure 7**

(A) SMA<sup>+</sup> stromal fibroblasts in ovarian cancer stroma. Immunohistochemistry (IHC) was conducted in ovarian cancer TMAs. The number and distribution of SMA<sup>+</sup> cells were scored from 0 to 4. Representative images are shown. Scale bar, 100  $\mu$ m.

(B) CD8<sup>+</sup> T cells in ovarian cancer stroma. Immunohistochemistry (IHC) was conducted in ovarian cancer TMAs. The density of CD8<sup>+</sup> T cells in tumor stroma was quantified. Representative images are shown. Scale bar, 100  $\mu$ m.
